# Supplementary material
Source: ML conference proceedings conference paper supplement (https://www.ecva.net/papers/eccv_2024/papers_ECCV/html/8399_ECCV_2024_paper.php)
Supplement: Supplementary file 1 [file 08399-supp.pdf]

# UniProcessor: A Text-induced Unified Low-level Image Processor (Supplemental Material)

Huiyu Duan<sup>1,2</sup>, Xionghuo Min<sup>1,\*</sup>, Sijing Wu<sup>1</sup>,  
Wei Shen<sup>2,\*</sup>, and Guangtao Zhai<sup>1,2</sup>

<sup>1</sup> Institute of Image Communication and Network Engineering,  
Shanghai Jiao Tong University

<sup>2</sup> MoE Key Lab of Artificial Intelligence, AI Institute, Shanghai Jiao Tong University  
{huiyuduan,minxionghuo,wusijing,wei.shen,zhaiguangtao}@sjtu.edu.cn

## 1 Distortion Bank

We adopt 30 commonly encountered distortions [10, 11, 18] with random levels for each type of degradation, to train our unified low-level image processor. Figure 1, 2, and 3 demonstrate the examples of the images degraded by various distortions with different levels. The details of each distortion type are explained below.

- **JPEG Compression**: Applies standard JPEG compression.
- **Gaussian Blur**: Filters the image with a Gaussian kernel.
- **Lens Blur**: Filters the image with a circular kernel.
- **Motion Blur**: Emulates motion blur by filtering using a line kernel.
- **Color Diffuse**: Applies Gaussian blur on the color channels (a and b) in the LAB-color space.
- **Color Shift**: Randomly shifts the green channel and blends it into the original image masked by a gray level map which is the normalized gradient magnitude of the original image.
- **Color Saturate**: Multiplies the saturation channel in the HSV-color space by a factor.
- **Gaussian Noise (RGB)**: Adds Gaussian white noise in the RGB color space.
- **Gaussian Noise (YCbCr)**: Adds Gaussian white noise in the YCbCr color space.
- **Impulse Noise**: Adds salt and pepper noise in the RGB color space.
- **Multiplicative Noise**: Adds speckle noise in the RGB color space.
- **Denoise**: Adds Gaussian noise and then applies a Gaussian blur filter to remove the noise.
- **Over Bright**: Increases the brightness of the image by applying a non-linear curve fitting to avoid changing extreme values.

- ***Low-light***: Decreases the brightness of the image by applying a non-linear curve fitting to avoid changing extreme values.
- ***Mean Shift***: Shifts the mean intensity of the image by adding a constant value to all pixel values and truncating to the original value range.
- ***Resize Bicubic / Super Resolution (SR) Bicubic***: Downsamples the image and upsamples it back to the original size using bicubic interpolation. This is also a super-resolution task, which only downsamples the image using bicubic interpolation (the bicubic upsample process is inherently involved in the SR procedure).
- ***Resize Bilinear / SR Bilinear***: Downsamples the image and upsamples it back to the original size using bilinear interpolation. This is also a super-resolution task, which only downsamples the image using bicubic interpolation (the bilinear upsample process is inherently involved in the SR procedure).
- ***Resize Nearest / SR Nearest***: Downsamples the image and upsamples it back to the original size using nearest interpolation. This is also a super-resolution task, which only downsamples the image using bicubic interpolation (the nearest upsample process is inherently involved in the SR procedure).
- ***Resize Lanczos / SR Lanczos***: Downsamples the image and upsamples it back to the original size using lanczos interpolation. This is also a super-resolution task, which only downsamples the image using bicubic interpolation (the lanczos upsample process is inherently involved in the SR procedure).
- ***Sharpening (Unsharp Masking)***: Increases the sharpness of an image by using unsharp masking.
- ***Contrast***: Changes the contrast of the image by applying a non-linear Sigmoid-type curve on the RGB values.
- ***color Block***: Inserts randomly colored blocks at random locations in the image.
- ***Pixelate***: Makes a pixelate style for the image.
- ***Discontinuous (Non-eccentricity)***: Randomly offsets small patches in the image by small displacements.
- ***Jitter***: Randomly scatters image data by warping each pixel with small random offsets.
- ***Mosaic***: Emulates incomplete color samples output from an image sensor overlaid with a color filter array (CFA) by applying a CFA mask
- ***Irregular Black Mask***: Paints the image with randomly irregular black masks.
- ***Rectangle Black Mask***: Paints the image with randomly rectangle black masks.

**Table 1:** Details of the training and testing on 30 degradation-restoration tasks.

| Degradation        | Degradation factor | Training level           | Testing (heavy) | Testing (middle) | Testing (slight) |
|--------------------|--------------------|--------------------------|-----------------|------------------|------------------|
| JPEG comp.         | quality factor     | [5,96]                   | 7               | 20               | 40               |
| Gauss. blur        | sigma              | [0,1,5]                  | 5               | 1                | 0.1              |
| Lens blur          | radius             | [1,8]                    | 8               | 4                | 1                |
| Motion blur        | kernel size        | [12,28]                  | 28              | 20               | 12               |
| Color diffuse      | amount             | [1,12]                   | 12              | 6                | 1                |
| Color shift        | amount             | [1,12]                   | 12              | 6                | 1                |
| Color saturate     | amount             | [0.4,-0.4]               | -0.4            | 0.1              | 0.4              |
| Color saturate 2   | amount             | [1,9]                    | 9               | 3                | 1                |
| Gauss. noise       | sigma              | [0, 50]                  | 50              | 25               | 15               |
| GN (ycbcr)         | amount             | [0.0001, 0.003]          | 0.003           | 0.001            | 0.0001           |
| Impulse noise      | amount             | [0.001, 0.03]            | 0.03            | 0.01             | 0.001            |
| Multipli. noise    | amount             | [0.001, 0.05]            | 0.05            | 0.01             | 0.001            |
| Denoise            | sigma              | [0, 50]                  | 50              | 25               | 15               |
| Over bright        | amount             | [0.1, 1.1]               | 1.1             | 0.4              | 0.1              |
| Low-light          | amount             | [0.05, 0.8]              | 0.8             | 0.2              | 0.05             |
| Mean shift         | amount             | [0.15, -0.15]            | -0.15           | -0.15            | 0                |
| Bicubic resize/SR  | scale              | [2, 16]                  | 16              | 4                | 2                |
| Bilinear resize/SR | scale              | [2, 16]                  | 16              | 4                | 2                |
| Nearest resize/SR  | scale              | [2, 16]                  | 6               | 4                | 2                |
| Lanczos resize/SR  | scale              | [2, 16]                  | 16              | 4                | 2                |
| Sharpening         | amount             | [1, 12]                  | 12              | 3                | 1                |
| Contrast imbal.    | amount             | [0.3, -0.6]              | -0.6            | 0                | 0                |
| Color block        | amount             | [2, 10]                  | 10              | 6                | 2                |
| Pixelate           | amount             | [0.01, 0.5]              | 0.5             | 0.1              | 0.01             |
| Discontinuous      | amount             | [20, 100]                | 100             | 60               | 20               |
| Jitter             | amount             | [0.05, 1]                | 1               | 0.2              | 0.05             |
| Mosaic             | constant           | 1                        | 1               | 1                | 1                |
| Irregular mask     | amount             | [0,20],[0,100],[0,30]    | 20,100,30       | 10,50,15         | 10,25,10         |
| Block mask         | amount             | [0,10],[30,100]          | 10,[30,100]     | 5,[15,50]        | 5,[10,25]        |
| Rain streak        | amount             | [1000,5000],[4,10],[3,8] | 5000,10,7       | 2500,7,3         | 700,7,1          |
| Snow streak        | amount             | [300,1000],[1,3],[1,4]   | 1000,4,1        | 500,3,1          | 250,3,1          |

- **Rain Streak:** Adds rain streaks with random length, direction, thickness, blur level, to the image.
- **Snow Streak:** Adds snow streaks with random length, direction, thickness, blur level, to the image.

Table 1 demonstrates the detailed distortions and corresponding levels used in our unified image processing setting. For various degradations, we train all tasks using one model with various degradation levels. For testing, we validate and compare the performance on the selected levels.

## 2 More Details of UniProcessor

### 2.1 More Details of Low-level Vision-language Instruction Tuning

**Details of VQA data preparation.** In order to enable the low-level vision visual question answering (VQA) ability of our UniProcessor, we construct a new VQA database, which includes over 70000 clean image patches and a distortion bank with 30 degradation types as aforementioned. For each [degradation], we impose it to the clean image and generate the questions and answers according to the following template.

*Questions:*

- What is the main factor that influences the quality of this image?
- What is the distortion in this image?
- What is the distortion level of this image?
- Please describe the quality and the distortion type of this image.
- Please describe the distortion type and the distortion level of this image.
- How is the clarity of the image?
- Is this image [random degradation]?

*Answers:*

- The main factor that influences the quality of this image is [degradation] artifacts.
- The distortion in this image is [degradation].
- The distortion level of this image is [level].
- This is a low-quality image. The distortion type of this image is [degradation] artifacts.
- The distortion type of this image is [degradation] artifacts, and the distortion level of this image is [level].
- The clarity of the image is [clarity].
- Answer [yes or no].

Specifically, the [degradation] represents the distortion type, the [level] means the degradation level description, the [clarity] means the clarity description according to the degradation level, the [yes or no] indicates the yes or no answer. Especially, we set three levels for the [level] item including “severe”, “moderate”, and “slight”, and the specific option answer is from the specific parameter range. For [clarity] item, we also set three levels including “bad”, “not good”, and “good” according to the [level] option. The answer [yes or no] is based on whether the degradation type imposed to the image is consistent with the description in the question.

**Details of Q-Former.** Both of the instruction-tuned VQA module and the context control module contain the Q-Former. The functions of two Q-Formers are different. The Q-Former in the instruction-tuned VQA-module mainly focuses on extracting the instruction-aware embeddings to guide the LLM VQA behavior. The Q-Former in the context control module mainly focuses on extracting low-level subject-aware features for facilitating the manipulation prompt to control the processing behavior. However, the structure of the two Q-Formers is same. As shown in Figure 4, Q-Former is a trainable light-weight module to bridge the gap between a frozen image encoder and the following LLM or text-encoder. Q-Former consists of two transformer sub-modules including an image transformer that interacts with the frozen image encoder for visual feature extraction and a text transformer that functions as both text encoder and decoder. The learnable queries interact with each other as well as the text-tokens through self-attention layers and interact with the image embeddings through cross-attention layers. Different from BLIP-2 [5], the Q-Former in our UniProcessor aims to extract the most informative low-level related features for VQA and processing control.

**Table 2:** Results of VQA accuracy.

| Model | InstructBLIP [1] | UniProcessor |
|-------|------------------|--------------|
| Acc.  | 18.3             | 65.5         |

## 2.2 More Details of Degradation-aware Subject and Manipulation Representation Learning

**Details of subject prompt and manipulation prompt generation.** As shown in Figure 2 of the main paper, the context control module contains an image input and two text inputs including a subject prompt and a manipulation prompt. The function of the subject prompt is to disentangle and obtain the subject-related low-level features for the image, and the function of the manipulation prompt is to decide the manipulation behavior of the processor backbone. We generate the subject prompt following the template of:

- a low-quality image with [degradation] distortion.

The manipulation prompt contains the operations of:

- remove the distortion in this image.
- keep the image unchanged.
- remove the [degradation] distortion in the image.

Then these two prompts are fed into the context control module for generating context control embeddings.

## 2.3 More Details of the Processor Backbone

We follow the CSformer [3] to build the Processor backbone. To improve the efficiency of the network, we replace the Swin-transformer layer [7] using the convnext block [14]. Moreover, we further demonstrate the channel-attention module of the processor backbone in Figure 5.

## 3 More Experimental Results of Low-level VQA Tuning

Figure 6 qualitatively demonstrates the low-level VQA results of our tuned UniProcessor and InstructBLIP [1]. It can be observed that our UniProcessor can generate more accurate degradation-aware answers compared to InstructBLIP [1]. Specifically, InstructBLIP [1] cannot recognize the JPEG compression and the noise distortion well, and may answer “no distortion” for corresponding questions. Moreover, InstructBLIP [1] may have hallucinations and generate inconsistent answers, *e.g.*, it may answer “no” for distortion recognition but may give a level for the “level” question. Our tuned UniProcessor can overcome this defect, and generate more accurate answer. Moreover, we further conduct an experiment to validate the effectiveness of the low-level degradation-aware tuning strategy. As shown in Table 2, after instruction tuning, the accuracy of degradation recognition can be effectively improved.

**Table 3:** Comparison results for **30 degradations** with **middle** level on the CBSD68 dataset [8]. Our model outperforms other state-of-the-art models for almost all degradation types in terms of the three most commonly used evaluation metrics, *i.e.*, PSNR  $\uparrow$ , SSIM  $\uparrow$  [13], and LPIPS  $\downarrow$  [19]. The best results are colored in **red**.

| Degradation     | DRUNet [17]           |                       |                       | MPRNet [16]           |                              |                       | SwinIR [4]                   |      |       | Uformer [12] |      |       | Restormer [15] |      |       | PromptIR [4] |      |       | UniProcessor (Ours) |      |       |
|-----------------|-----------------------|-----------------------|-----------------------|-----------------------|------------------------------|-----------------------|------------------------------|------|-------|--------------|------|-------|----------------|------|-------|--------------|------|-------|---------------------|------|-------|
|                 | PSNR                  | SSIM                  | LPIPS                 | PSNR                  | SSIM                         | LPIPS                 | PSNR                         | SSIM | LPIPS | PSNR         | SSIM | LPIPS | PSNR           | SSIM | LPIPS | PSNR         | SSIM | LPIPS | PSNR                | SSIM | LPIPS |
| JPEG comp.      | 29.09 / 0.847 / 0.229 | 28.91 / 0.843 / 0.229 | 28.29 / 0.834 / 0.247 | 29.20 / 0.853 / 0.207 | 29.21 / 0.853 / 0.204        | 29.21 / 0.853 / 0.212 | <b>29.44 / 0.858 / 0.202</b> |      |       |              |      |       |                |      |       |              |      |       |                     |      |       |
| Gauss. blur     | 30.96 / 0.917 / 0.167 | 31.53 / 0.923 / 0.130 | 29.98 / 0.890 / 0.226 | 30.79 / 0.905 / 0.177 | 33.44 / 0.948 / 0.057        | 32.92 / 0.942 / 0.081 | <b>34.89 / 0.961 / 0.038</b> |      |       |              |      |       |                |      |       |              |      |       |                     |      |       |
| Lens blur       | 26.62 / 0.765 / 0.301 | 27.16 / 0.798 / 0.245 | 24.58 / 0.657 / 0.460 | 27.28 / 0.799 / 0.265 | 28.13 / 0.828 / 0.231        | 28.60 / 0.848 / 0.221 | <b>30.30 / 0.892 / 0.082</b> |      |       |              |      |       |                |      |       |              |      |       |                     |      |       |
| Motion blur     | 23.69 / 0.630 / 0.453 | 23.47 / 0.629 / 0.474 | 21.89 / 0.531 / 0.552 | 23.55 / 0.629 / 0.465 | 25.61 / 0.754 / 0.270        | 25.21 / 0.728 / 0.340 | <b>26.30 / 0.782 / 0.228</b> |      |       |              |      |       |                |      |       |              |      |       |                     |      |       |
| Color diffuse   | 24.13 / 0.903 / 0.162 | 27.38 / 0.943 / 0.112 | 26.29 / 0.936 / 0.115 | 28.76 / 0.948 / 0.098 | 28.07 / 0.949 / 0.105        | 28.39 / 0.950 / 0.107 | <b>29.96 / 0.956 / 0.093</b> |      |       |              |      |       |                |      |       |              |      |       |                     |      |       |
| Color shift     | 37.41 / 0.989 / 0.030 | 38.93 / 0.995 / 0.020 | 36.33 / 0.992 / 0.026 | 41.09 / 0.996 / 0.016 | 41.29 / 0.997 / 0.015        | 40.53 / 0.996 / 0.017 | 43.98 / 0.997 / 0.008        |      |       |              |      |       |                |      |       |              |      |       |                     |      |       |
| Color saturate  | 21.39 / 0.936 / 0.191 | 20.98 / 0.935 / 0.198 | 22.85 / 0.940 / 0.171 | 24.95 / 0.944 / 0.142 | 23.67 / 0.944 / 0.181        | 29.21 / 0.962 / 0.074 | 33.98 / 0.978 / 0.024        |      |       |              |      |       |                |      |       |              |      |       |                     |      |       |
| Color saturate  | 24.81 / 0.919 / 0.118 | 30.42 / 0.970 / 0.047 | 29.20 / 0.957 / 0.071 | 30.80 / 0.970 / 0.044 | 32.38 / 0.972 / 0.033        | 33.69 / 0.977 / 0.030 | <b>36.49 / 0.982 / 0.019</b> |      |       |              |      |       |                |      |       |              |      |       |                     |      |       |
| Gauss. noise    | 30.18 / 0.855 / 0.155 | 30.15 / 0.852 / 0.164 | 30.06 / 0.849 / 0.155 | 30.44 / 0.863 / 0.137 | 30.40 / 0.865 / 0.125        | 30.31 / 0.864 / 0.134 | <b>30.63 / 0.876 / 0.120</b> |      |       |              |      |       |                |      |       |              |      |       |                     |      |       |
| GN (ycbcr)      | 32.36 / 0.908 / 0.086 | 32.56 / 0.908 / 0.093 | 32.38 / 0.902 / 0.101 | 32.82 / 0.914 / 0.075 | 32.87 / 0.915 / 0.068        | 32.86 / 0.916 / 0.072 | <b>33.22 / 0.922 / 0.072</b> |      |       |              |      |       |                |      |       |              |      |       |                     |      |       |
| Impulse noise   | 44.28 / 0.996 / 0.004 | 45.53 / 0.996 / 0.002 | 44.77 / 0.995 / 0.005 | 43.95 / 0.996 / 0.003 | 47.85 / 0.998 / 0.001        | 47.98 / 0.998 / 0.001 | <b>48.59 / 0.998 / 0.001</b> |      |       |              |      |       |                |      |       |              |      |       |                     |      |       |
| Multipli. noise | 34.25 / 0.944 / 0.055 | 34.82 / 0.949 / 0.050 | 34.81 / 0.948 / 0.049 | 35.01 / 0.951 / 0.043 | 35.21 / 0.952 / 0.035        | 35.24 / 0.954 / 0.039 | <b>35.64 / 0.957 / 0.040</b> |      |       |              |      |       |                |      |       |              |      |       |                     |      |       |
| Denoise         | 25.82 / 0.715 / 0.452 | 25.95 / 0.719 / 0.452 | 24.83 / 0.662 / 0.537 | 26.08 / 0.720 / 0.420 | <b>26.21 / 0.724 / 0.463</b> | 25.11 / 0.673 / 0.543 | 25.53 / 0.680 / 0.471        |      |       |              |      |       |                |      |       |              |      |       |                     |      |       |
| Over bright     | 17.50 / 0.902 / 0.076 | 20.20 / 0.924 / 0.060 | 21.03 / 0.925 / 0.062 | 21.41 / 0.939 / 0.049 | 26.31 / 0.971 / 0.024        | 26.47 / 0.976 / 0.017 | <b>29.33 / 0.983 / 0.009</b> |      |       |              |      |       |                |      |       |              |      |       |                     |      |       |
| Low-light       | 21.50 / 0.936 / 0.037 | 22.51 / 0.948 / 0.028 | 23.21 / 0.941 / 0.049 | 23.45 / 0.948 / 0.037 | 29.39 / 0.983 / 0.012        | 38.45 / 0.994 / 0.005 | <b>46.35 / 0.998 / 0.001</b> |      |       |              |      |       |                |      |       |              |      |       |                     |      |       |
| Mean shift      | 19.13 / 0.866 / 0.070 | 22.74 / 0.913 / 0.052 | 19.28 / 0.862 / 0.093 | 21.00 / 0.882 / 0.050 | 23.26 / 0.915 / 0.035        | 24.41 / 0.927 / 0.032 | <b>27.99 / 0.947 / 0.023</b> |      |       |              |      |       |                |      |       |              |      |       |                     |      |       |
| Bicubic resize  | 25.43 / 0.716 / 0.398 | 25.34 / 0.704 / 0.424 | 25.12 / 0.706 / 0.429 | 25.63 / 0.724 / 0.385 | 25.71 / 0.717 / 0.408        | 25.74 / 0.720 / 0.407 | <b>26.02 / 0.734 / 0.380</b> |      |       |              |      |       |                |      |       |              |      |       |                     |      |       |
| Bilinear resize | 25.12 / 0.696 / 0.424 | 25.27 / 0.701 / 0.426 | 24.58 / 0.671 / 0.462 | 25.50 / 0.716 / 0.385 | 25.63 / 0.716 / 0.401        | 25.59 / 0.717 / 0.411 | 25.91 / 0.730 / 0.382        |      |       |              |      |       |                |      |       |              |      |       |                     |      |       |
| Nearest resize  | 23.58 / 0.662 / 0.370 | 23.21 / 0.650 / 0.384 | 23.20 / 0.652 / 0.413 | 23.55 / 0.668 / 0.394 | 23.50 / 0.665 / 0.384        | 23.52 / 0.665 / 0.371 | <b>23.73 / 0.674 / 0.360</b> |      |       |              |      |       |                |      |       |              |      |       |                     |      |       |
| Lanczos resize  | 25.45 / 0.721 / 0.417 | 25.43 / 0.713 / 0.437 | 25.15 / 0.713 / 0.434 | 25.65 / 0.721 / 0.408 | 25.67 / 0.718 / 0.417        | 25.74 / 0.719 / 0.421 | <b>25.98 / 0.733 / 0.389</b> |      |       |              |      |       |                |      |       |              |      |       |                     |      |       |
| Sharpening      | 29.75 / 0.924 / 0.087 | 31.50 / 0.948 / 0.051 | 27.63 / 0.870 / 0.135 | 30.88 / 0.937 / 0.072 | 32.41 / 0.965 / 0.043        | 32.77 / 0.968 / 0.036 | <b>33.39 / 0.974 / 0.028</b> |      |       |              |      |       |                |      |       |              |      |       |                     |      |       |
| Contrast imbal. | 25.65 / 0.935 / 0.038 | 26.14 / 0.941 / 0.030 | 23.77 / 0.937 / 0.054 | 26.07 / 0.949 / 0.035 | 32.41 / 0.981 / 0.014        | 35.07 / 0.984 / 0.008 | <b>40.60 / 0.993 / 0.003</b> |      |       |              |      |       |                |      |       |              |      |       |                     |      |       |
| Color block     | 32.44 / 0.971 / 0.047 | 32.72 / 0.974 / 0.048 | 32.45 / 0.973 / 0.042 | 33.05 / 0.974 / 0.041 | 33.97 / 0.977 / 0.039        | 34.39 / 0.979 / 0.037 | <b>35.31 / 0.981 / 0.031</b> |      |       |              |      |       |                |      |       |              |      |       |                     |      |       |
| Pixelate        | 27.13 / 0.843 / 0.143 | 28.50 / 0.887 / 0.087 | 27.17 / 0.855 / 0.134 | 26.78 / 0.858 / 0.105 | 28.26 / 0.881 / 0.079        | 27.89 / 0.875 / 0.084 | <b>29.82 / 0.909 / 0.060</b> |      |       |              |      |       |                |      |       |              |      |       |                     |      |       |
| Discontinuous   | 28.55 / 0.934 / 0.047 | 28.58 / 0.937 / 0.038 | 27.10 / 0.928 / 0.052 | 26.83 / 0.922 / 0.058 | 31.33 / 0.952 / 0.041        | 29.11 / 0.941 / 0.035 | <b>32.02 / 0.957 / 0.038</b> |      |       |              |      |       |                |      |       |              |      |       |                     |      |       |
| Jitter          | 29.08 / 0.904 / 0.091 | 30.23 / 0.916 / 0.094 | 29.46 / 0.900 / 0.133 | 29.49 / 0.913 / 0.079 | 30.41 / 0.922 / 0.074        | 30.22 / 0.918 / 0.081 | <b>30.86 / 0.927 / 0.061</b> |      |       |              |      |       |                |      |       |              |      |       |                     |      |       |
| Mosaic          | 36.46 / 0.984 / 0.017 | 35.66 / 0.972 / 0.017 | 35.07 / 0.976 / 0.021 | 38.20 / 0.985 / 0.014 | 38.18 / 0.983 / 0.016        | 38.21 / 0.985 / 0.018 | <b>40.62 / 0.990 / 0.009</b> |      |       |              |      |       |                |      |       |              |      |       |                     |      |       |
| Irregular mask  | 33.06 / 0.971 / 0.035 | 35.02 / 0.978 / 0.029 | 33.23 / 0.973 / 0.033 | 34.46 / 0.975 / 0.030 | 34.73 / 0.976 / 0.028        | 36.44 / 0.979 / 0.027 | <b>38.51 / 0.981 / 0.022</b> |      |       |              |      |       |                |      |       |              |      |       |                     |      |       |
| Block mask      | 36.63 / 0.983 / 0.022 | 40.77 / 0.990 / 0.016 | 36.24 / 0.987 / 0.020 | 37.37 / 0.984 / 0.022 | 39.29 / 0.988 / 0.016        | 44.63 / 0.991 / 0.015 | 48.96 / 0.993 / 0.012        |      |       |              |      |       |                |      |       |              |      |       |                     |      |       |
| Rain streak     | 26.71 / 0.819 / 0.156 | 27.92 / 0.842 / 0.132 | 27.84 / 0.860 / 0.124 | 28.73 / 0.859 / 0.126 | 29.64 / 0.875 / 0.100        | 30.19 / 0.888 / 0.090 | <b>30.83 / 0.904 / 0.074</b> |      |       |              |      |       |                |      |       |              |      |       |                     |      |       |
| Snow streak     | 32.49 / 0.949 / 0.044 | 35.74 / 0.972 / 0.024 | 35.06 / 0.971 / 0.027 | 33.88 / 0.963 / 0.029 | 37.92 / 0.979 / 0.018        | 37.71 / 0.980 / 0.017 | <b>37.99 / 0.984 / 0.010</b> |      |       |              |      |       |                |      |       |              |      |       |                     |      |       |
| Clean image     | 41.23 / 0.990 / 0.009 | 53.36 / 0.999 / 0.001 | 39.31 / 0.995 / 0.006 | 40.98 / 0.987 / 0.014 | 49.17 / 0.997 / 0.002        | 62.24 / 0.999 / 0.001 | <b>80.16 / 0.999 / 0.000</b> |      |       |              |      |       |                |      |       |              |      |       |                     |      |       |
| Average         | 28.81 / 0.876 / 0.154 | 30.27 / 0.887 / 0.144 | 28.82 / 0.868 / 0.170 | 29.93 / 0.887 / 0.138 | 31.61 / 0.902 / 0.123        | 32.75 / 0.902 / 0.125 | <b>35.11 / 0.913 / 0.103</b> |      |       |              |      |       |                |      |       |              |      |       |                     |      |       |

## 4 More Experimental Results of UniProcessor

Table 3, 4, 5, and 6 show the quantitative results of the proposed UniProcessor and other state-of-the-art image restoration models on CBSD68 dataset with middle level degradation, CBSD68 dataset with slight level degradation, kodak dataset with severe degradation, 750 image-net validation dataset with severe degradation, respectively. It can be observed that our UniProcessor achieves better performance in most cases. Moreover, we further show qualitative results of these state-of-the-art models for processing various degradations in Figure 7, 8, 9, 10, 11, 12, 13, 14, 15, 16, 17, 18, 19, 20, 21, 22, and 23. These results qualitatively illustrate that our UniProcessor can well process these complex distortions with random levels using one model.



**Table 6:** Comparison results for **30 degradations** with **heavy** level on the imagenet validation set [2]. Our model outperforms other state-of-the-art models for almost all degradation types in terms of the three most commonly used evaluation metrics, *i.e.*, PSNR  $\uparrow$ , SSIM  $\uparrow$  [13], and LPIPS  $\downarrow$  [19]. The best results are colored in **red**.

| Degradation     | DRUNet [17]                  | MPRNet [16]           | SwinIR [4]            | Uformer [12]                 | Restormer [5]         | PromptIR [9]                 | UniProcessor (Ours)           |
|-----------------|------------------------------|-----------------------|-----------------------|------------------------------|-----------------------|------------------------------|-------------------------------|
|                 | PSNR / SSIM / PIPs           | PSNR / SSIM / PIPs    | PSNR / SSIM / PIPs    | PSNR / SSIM / PIPs           | PSNR / SSIM / PIPs    | PSNR / SSIM / PIPs           | PSNR / SSIM / PIPs            |
| JPEG comp.      | 25.35 / 0.732 / 0.322        | 25.16 / 0.728 / 0.341 | 24.76 / 0.720 / 0.361 | 25.49 / 0.743 / 0.306        | 25.53 / 0.742 / 0.304 | 25.53 / 0.745 / 0.302        | <b>25.86 / 0.752 / 0.298</b>  |
| Gauss. blur     | 23.05 / 0.603 / 0.497        | 22.86 / 0.594 / 0.525 | 22.13 / 0.557 / 0.570 | 23.43 / 0.621 / 0.470        | 23.98 / 0.652 / 0.448 | 23.98 / 0.670 / 0.429        | 24.57 / 0.681 / 0.403         |
| Lens blur       | 23.69 / 0.646 / 0.380        | 23.82 / 0.651 / 0.343 | 21.62 / 0.510 / 0.524 | 23.84 / 0.659 / 0.362        | 26.17 / 0.765 / 0.237 | 26.17 / 0.767 / 0.236        | <b>27.37 / 0.804 / 0.174</b>  |
| Motion blur     | 21.39 / 0.560 / 0.470        | 21.02 / 0.540 / 0.481 | 20.24 / 0.504 / 0.538 | 21.36 / 0.558 / 0.474        | 24.40 / 0.726 / 0.259 | 24.40 / 0.714 / 0.310        | <b>25.70 / 0.770 / 0.223</b>  |
| Color diffuse   | 20.46 / 0.807 / 0.239        | 22.00 / 0.831 / 0.210 | 21.31 / 0.826 / 0.217 | 23.73 / 0.850 / 0.185        | 22.67 / 0.845 / 0.193 | 22.67 / 0.848 / 0.185        | <b>25.02 / 0.869 / 0.164</b>  |
| Color shift     | 31.15 / 0.967 / 0.074        | 33.48 / 0.981 / 0.049 | 30.62 / 0.965 / 0.082 | 35.75 / 0.987 / 0.031        | 35.30 / 0.987 / 0.035 | 35.30 / 0.986 / 0.037        | <b>37.99 / 0.990 / 0.021</b>  |
| Color saturate  | 16.50 / 0.808 / 0.303        | 16.41 / 0.815 / 0.293 | 16.52 / 0.793 / 0.309 | 23.43 / 0.879 / 0.137        | 22.65 / 0.875 / 0.166 | 22.65 / 0.894 / 0.130        | <b>30.84 / 0.949 / 0.040</b>  |
| Color saturate  | 22.99 / 0.821 / 0.154        | 24.02 / 0.843 / 0.139 | 23.66 / 0.841 / 0.146 | 24.77 / 0.855 / 0.119        | 24.48 / 0.857 / 0.119 | 24.48 / 0.857 / 0.115        | <b>26.03 / 0.875 / 0.096</b>  |
| Gauss. noise    | 26.22 / 0.730 / 0.234        | 26.28 / 0.731 / 0.239 | 26.26 / 0.727 / 0.231 | <b>26.37 / 0.743 / 0.181</b> | 26.30 / 0.745 / 0.202 | 26.30 / 0.751 / 0.192        | <b>26.29 / 0.769 / 0.186</b>  |
| GN (ycbcr)      | 29.28 / 0.837 / 0.129        | 29.41 / 0.837 / 0.126 | 29.27 / 0.831 / 0.131 | 29.69 / 0.852 / 0.106        | 29.73 / 0.850 / 0.103 | 29.73 / 0.852 / 0.107        | <b>30.24 / 0.867 / 0.100</b>  |
| Impulse noise   | 37.88 / 0.979 / 0.014        | 39.06 / 0.985 / 0.009 | 37.23 / 0.973 / 0.022 | 38.29 / 0.981 / 0.010        | 41.16 / 0.989 / 0.007 | <b>41.16 / 0.990 / 0.005</b> | <b>41.08 / 0.990 / 0.004</b>  |
| Multipl. noise  | 29.08 / 0.850 / 0.130        | 29.71 / 0.861 / 0.117 | 29.57 / 0.854 / 0.121 | 30.00 / 0.872 / 0.096        | 30.08 / 0.873 / 0.095 | 30.08 / 0.875 / 0.096        | <b>30.74 / 0.889 / 0.088</b>  |
| Denoise         | 24.83 / 0.687 / 0.428        | 24.58 / 0.666 / 0.476 | 23.96 / 0.639 / 0.526 | <b>25.25 / 0.713 / 0.369</b> | 24.85 / 0.676 / 0.469 | 24.85 / 0.672 / 0.463        | <b>25.00 / 0.692 / 0.410</b>  |
| Over bright     | 15.14 / 0.705 / 0.259        | 17.16 / 0.753 / 0.222 | 16.82 / 0.761 / 0.204 | 19.09 / 0.810 / 0.167        | 19.14 / 0.812 / 0.160 | 19.14 / 0.835 / 0.142        | <b>22.02 / 0.857 / 0.115</b>  |
| Low-light       | 14.32 / 0.636 / 0.235        | 17.94 / 0.734 / 0.199 | 16.03 / 0.667 / 0.250 | 18.05 / 0.737 / 0.168        | 21.26 / 0.809 / 0.137 | 21.26 / 0.837 / 0.125        | <b>25.25 / 0.854 / 0.107</b>  |
| Mean shift      | 19.64 / 0.873 / 0.068        | 22.65 / 0.904 / 0.051 | 18.93 / 0.846 / 0.096 | 22.15 / 0.894 / 0.045        | 24.66 / 0.923 / 0.028 | 24.66 / 0.942 / 0.022        | <b>30.55 / 0.956 / 0.014</b>  |
| Bicubic resize  | 20.00 / 0.461 / 0.665        | 19.84 / 0.453 / 0.677 | 19.72 / 0.446 / 0.714 | 20.18 / 0.471 / 0.641        | 20.22 / 0.473 / 0.639 | 20.22 / 0.477 / 0.646        | <b>20.40 / 0.483 / 0.620</b>  |
| Bilinear resize | 19.85 / 0.456 / 0.663        | 19.66 / 0.447 / 0.676 | 19.44 / 0.438 / 0.709 | 20.09 / 0.469 / 0.633        | 20.12 / 0.470 / 0.637 | 20.12 / 0.475 / 0.649        | <b>21.84 / 0.481 / 0.625</b>  |
| Nearest resize  | 21.53 / 0.599 / 0.410        | 21.46 / 0.599 / 0.438 | 21.18 / 0.585 / 0.460 | 21.57 / 0.604 / 0.422        | 21.59 / 0.608 / 0.412 | 21.59 / 0.610 / 0.406        | <b>21.84 / 0.617 / 0.387</b>  |
| Lanczos resize  | 20.01 / 0.458 / 0.682        | 19.90 / 0.452 / 0.683 | 19.86 / 0.447 / 0.714 | 20.15 / 0.467 / 0.659        | 20.22 / 0.471 / 0.644 | 20.22 / 0.474 / 0.650        | <b>20.40 / 0.480 / 0.6277</b> |
| Sharpening      | 24.89 / 0.874 / 0.094        | 24.34 / 0.864 / 0.103 | 25.18 / 0.877 / 0.088 | 25.69 / 0.891 / 0.076        | 25.26 / 0.879 / 0.094 | 25.26 / 0.904 / 0.070        | <b>27.28 / 0.922 / 0.055</b>  |
| Contrast imbal. | 21.86 / 0.881 / 0.113        | 21.86 / 0.881 / 0.109 | 22.46 / 0.865 / 0.133 | 22.25 / 0.886 / 0.112        | 26.47 / 0.945 / 0.057 | 26.47 / 0.956 / 0.041        | <b>37.64 / 0.990 / 0.007</b>  |
| Color block     | 26.39 / 0.902 / 0.127        | 25.60 / 0.902 / 0.134 | 26.01 / 0.896 / 0.125 | 27.11 / 0.916 / 0.106        | 27.16 / 0.917 / 0.107 | 27.16 / 0.923 / 0.102        | <b>28.06 / 0.927 / 0.092</b>  |
| Pixelate        | 24.06 / 0.729 / 0.261        | 23.92 / 0.727 / 0.271 | 23.71 / 0.720 / 0.296 | 23.98 / 0.732 / 0.280        | 24.11 / 0.734 / 0.261 | 24.11 / 0.737 / 0.258        | <b>24.41 / 0.742 / 0.242</b>  |
| Discontinuous   | 23.42 / 0.782 / 0.187        | 21.71 / 0.771 / 0.142 | 21.16 / 0.759 / 0.170 | 21.55 / 0.769 / 0.167        | 24.69 / 0.831 / 0.120 | 24.69 / 0.810 / 0.128        | <b>24.93 / 0.841 / 0.112</b>  |
| Jitter          | 23.71 / 0.669 / <b>0.320</b> | 23.73 / 0.678 / 0.326 | 23.27 / 0.657 / 0.371 | 23.98 / 0.685 / 0.335        | 23.96 / 0.686 / 0.333 | 23.96 / 0.689 / 0.333        | <b>24.23 / 0.701 / 0.340</b>  |
| Mosaic          | 33.47 / 0.960 / 0.020        | 33.05 / 0.946 / 0.020 | 32.52 / 0.947 / 0.025 | 34.22 / 0.957 / 0.021        | 34.61 / 0.959 / 0.019 | 34.61 / 0.961 / 0.020        | <b>36.04 / 0.967 / 0.013</b>  |
| Irregular mask  | 23.41 / 0.786 / 0.241        | 23.54 / 0.792 / 0.235 | 22.79 / 0.772 / 0.238 | 24.06 / 0.801 / 0.216        | 24.39 / 0.800 / 0.224 | 24.39 / 0.806 / 0.219        | <b>25.48 / 0.817 / 0.203</b>  |
| Block mask      | 24.34 / 0.838 / 0.212        | 24.72 / 0.842 / 0.206 | 23.75 / 0.825 / 0.209 | 25.15 / 0.849 / 0.194        | 26.03 / 0.849 / 0.196 | 26.03 / 0.854 / 0.192        | <b>27.71 / 0.858 / 0.186</b>  |
| Rain streak     | 23.94 / 0.776 / 0.140        | 24.45 / 0.802 / 0.124 | 22.43 / 0.787 / 0.137 | 24.40 / 0.823 / 0.102        | 26.55 / 0.844 / 0.088 | 26.55 / 0.854 / 0.077        | <b>28.30 / 0.883 / 0.063</b>  |
| Snow streak     | 23.04 / 0.671 / 0.327        | 23.59 / 0.707 / 0.293 | 24.57 / 0.773 / 0.228 | <b>29.50 / 0.892 / 0.080</b> | 22.12 / 0.654 / 0.340 | 22.12 / 0.753 / 0.239        | <b>29.48 / 0.881 / 0.101</b>  |
| Clean image     | 39.41 / 0.979 / 0.022        | 45.89 / 0.991 / 0.009 | 37.93 / 0.979 / 0.023 | 44.65 / 0.988 / 0.014        | 54.41 / 0.995 / 0.003 | 54.41 / 0.997 / 0.002        | <b>71.91 / 0.999 / 0.000</b>  |
| Average         | 24.20 / 0.752 / 0.263        | 24.78 / 0.760 / 0.259 | 23.90 / 0.743 / 0.280 | 25.60 / 0.780 / 0.228        | 26.38 / 0.789 / 0.223 | 26.38 / 0.797 / 0.216        | <b>28.84 / 0.817 / 0.191</b>  |



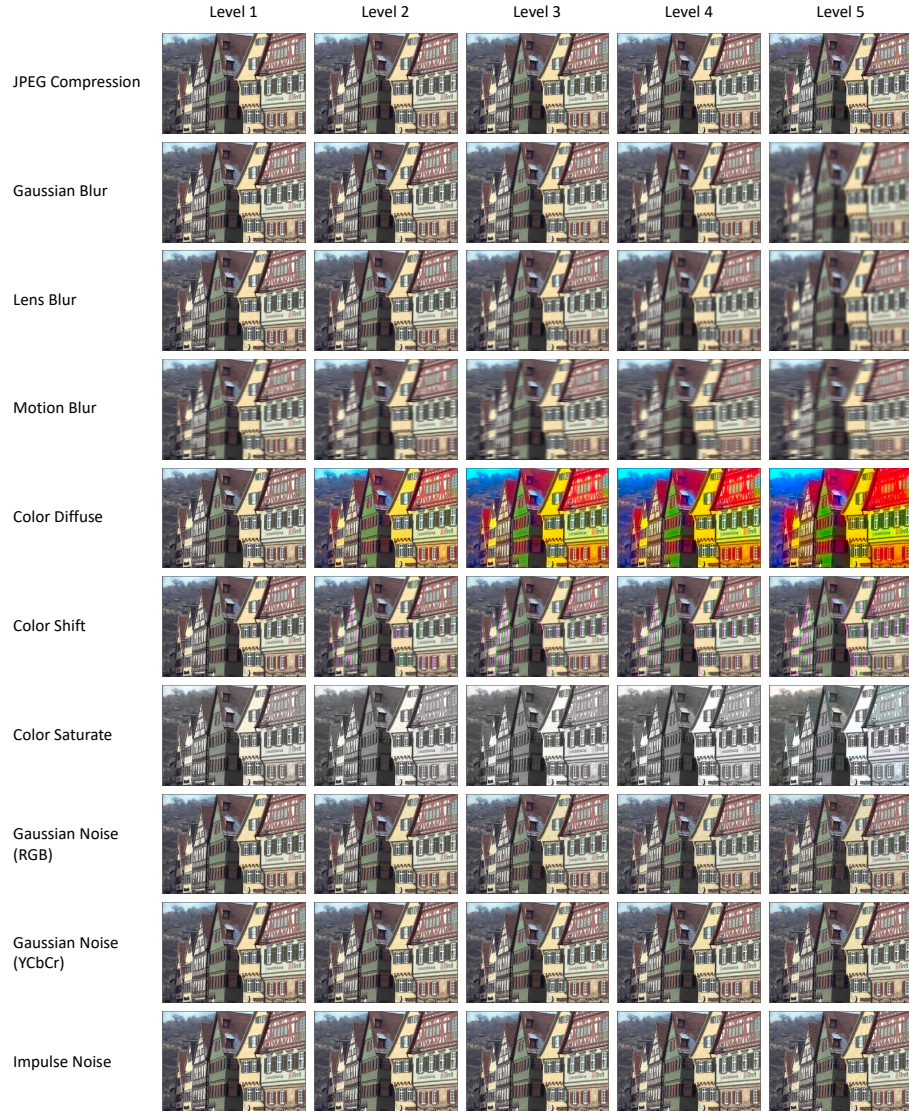

**Fig. 1:** An illustration of the degradations in the distortion bank. Better in zoomed-in view.

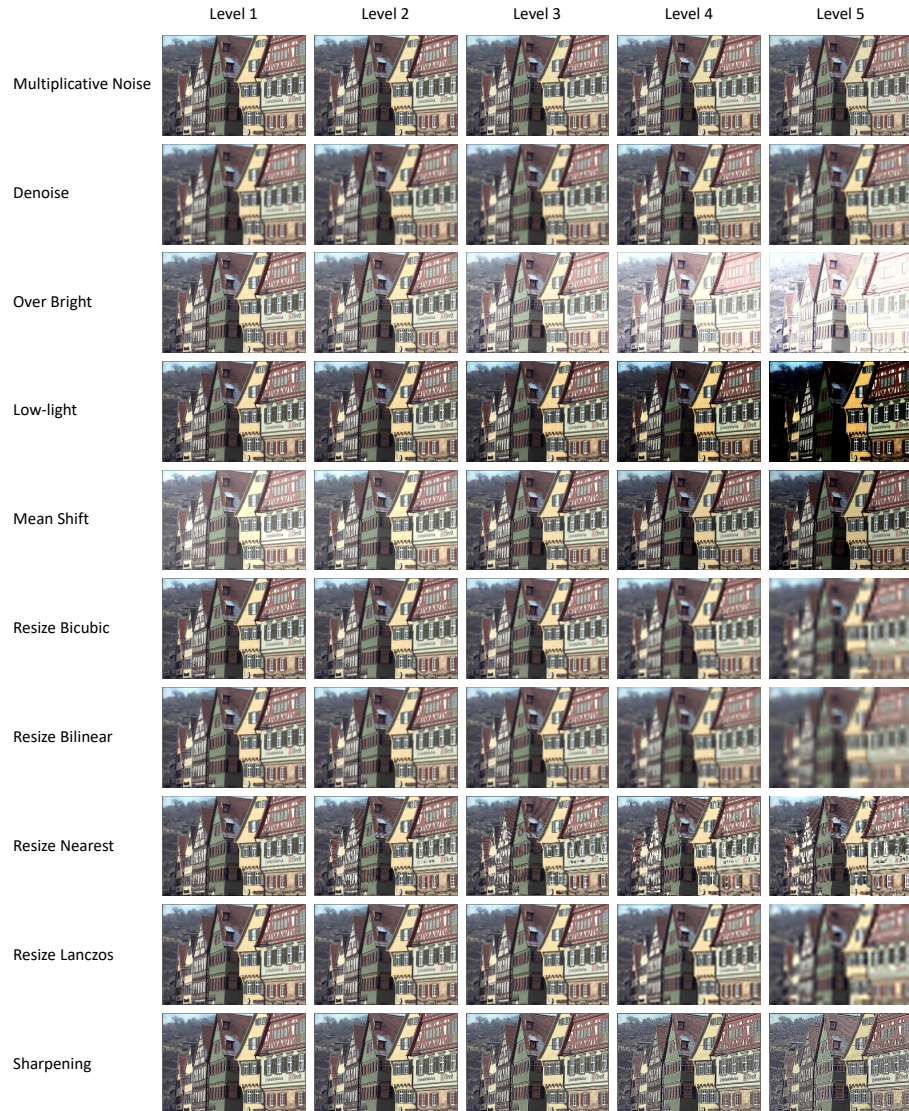

**Fig. 2:** An illustration of the degradations in the distortion bank (continued). Better in zoomed-in view.

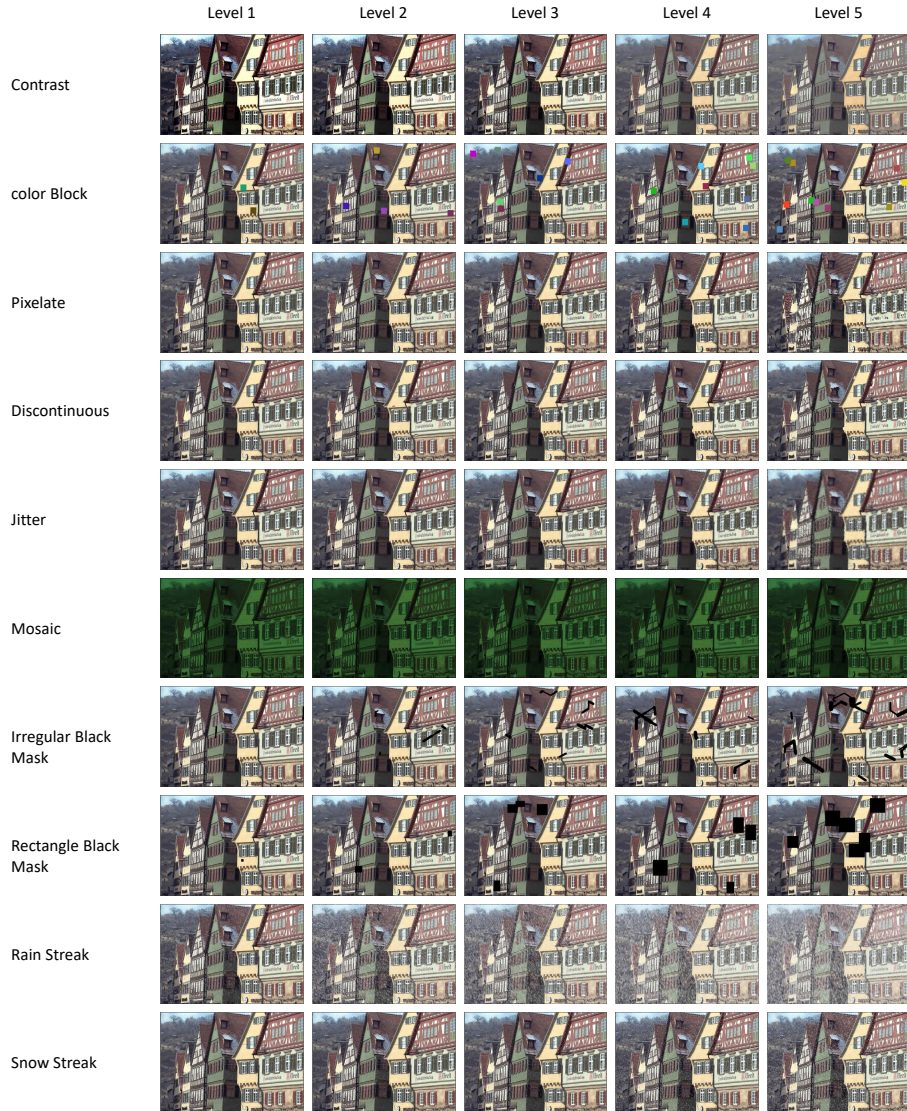

**Fig. 3:** An illustration of the degradations in the distortion bank (continued). Better in zoomed-in view.

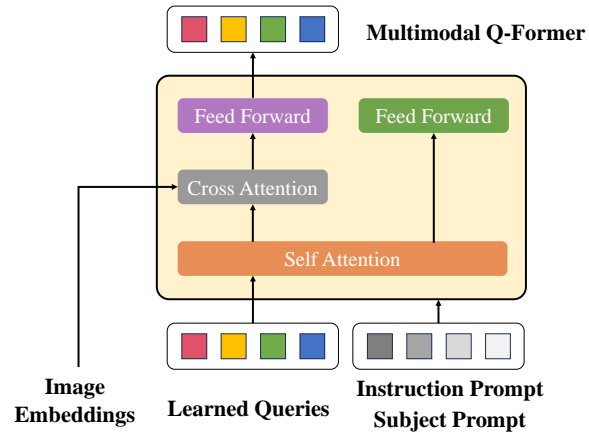

Fig. 4: The illustration of the Q-former.

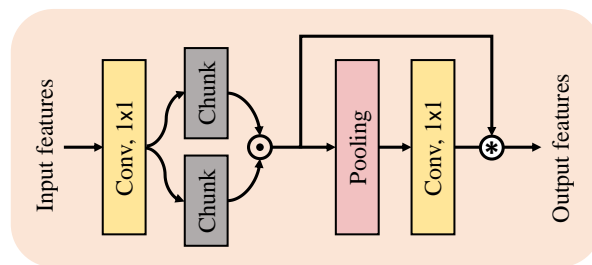

Fig. 5: The illustration of the channel-attention block.

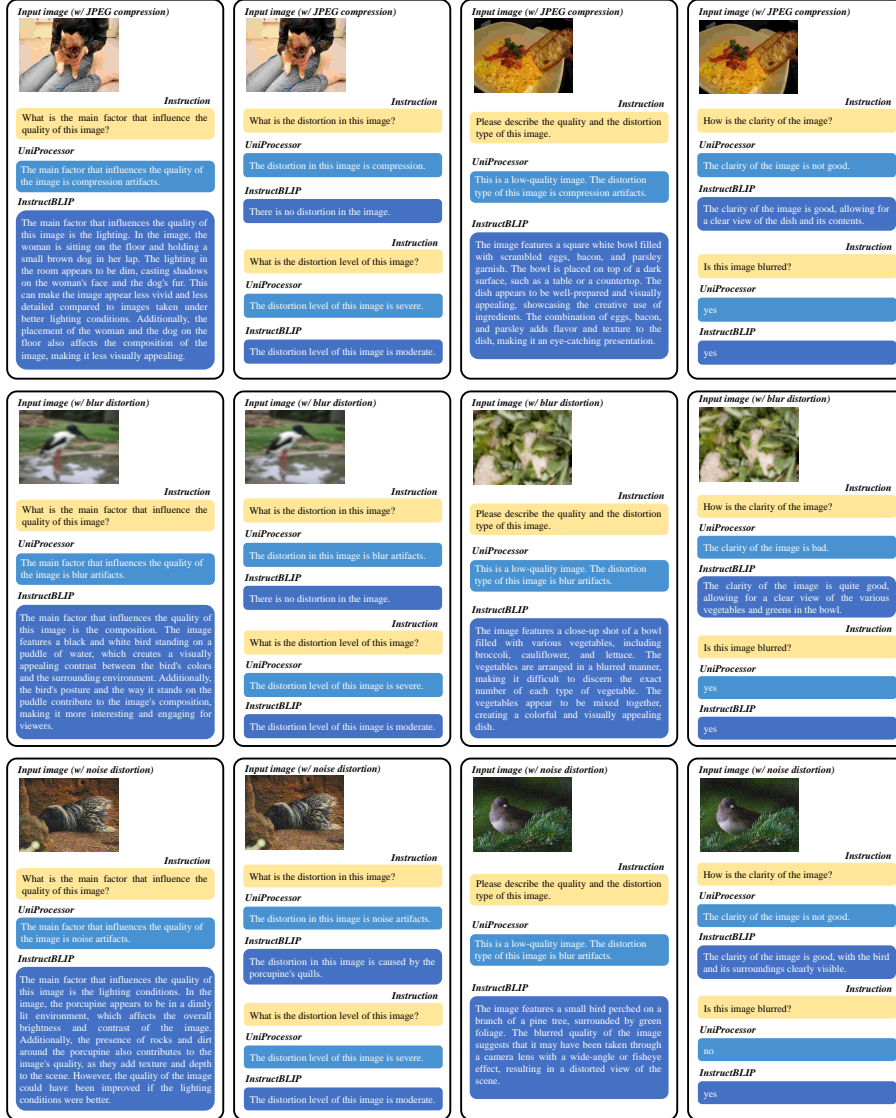

**Fig. 6:** Comparisons of low-level visual question answering performance between UniProcessor and InstructBLIP [1]. Our UniProcessor achieves better performance on the low-level degradation-aware VQA task.

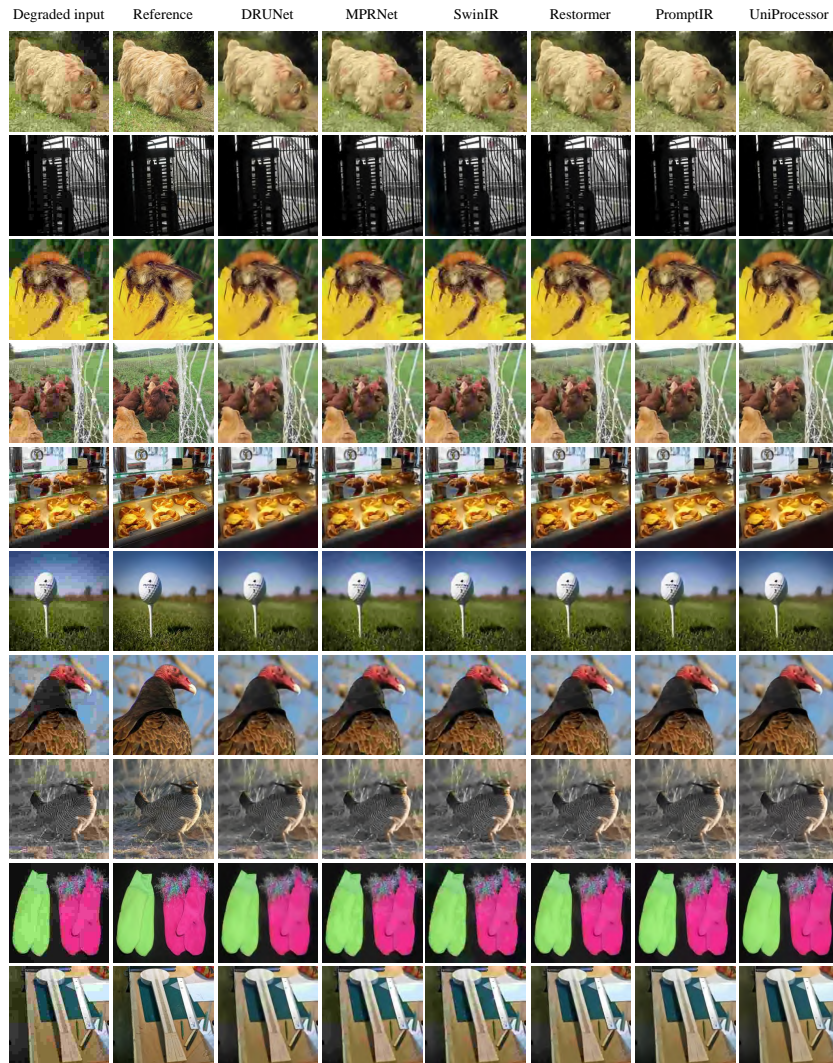

**Fig. 7:** Visual comparison of different methods on the task of removing JPEG compression.

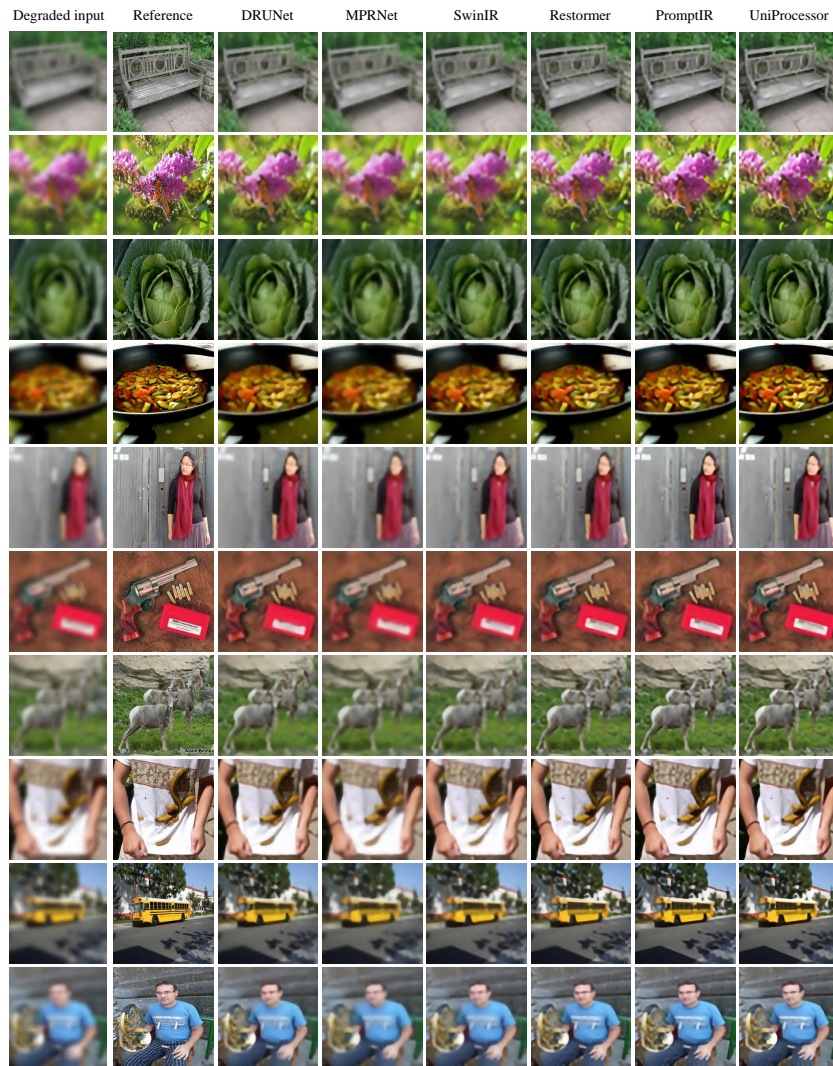

Fig. 8: Visual comparison of different methods on the task of removing Gaussian blur.

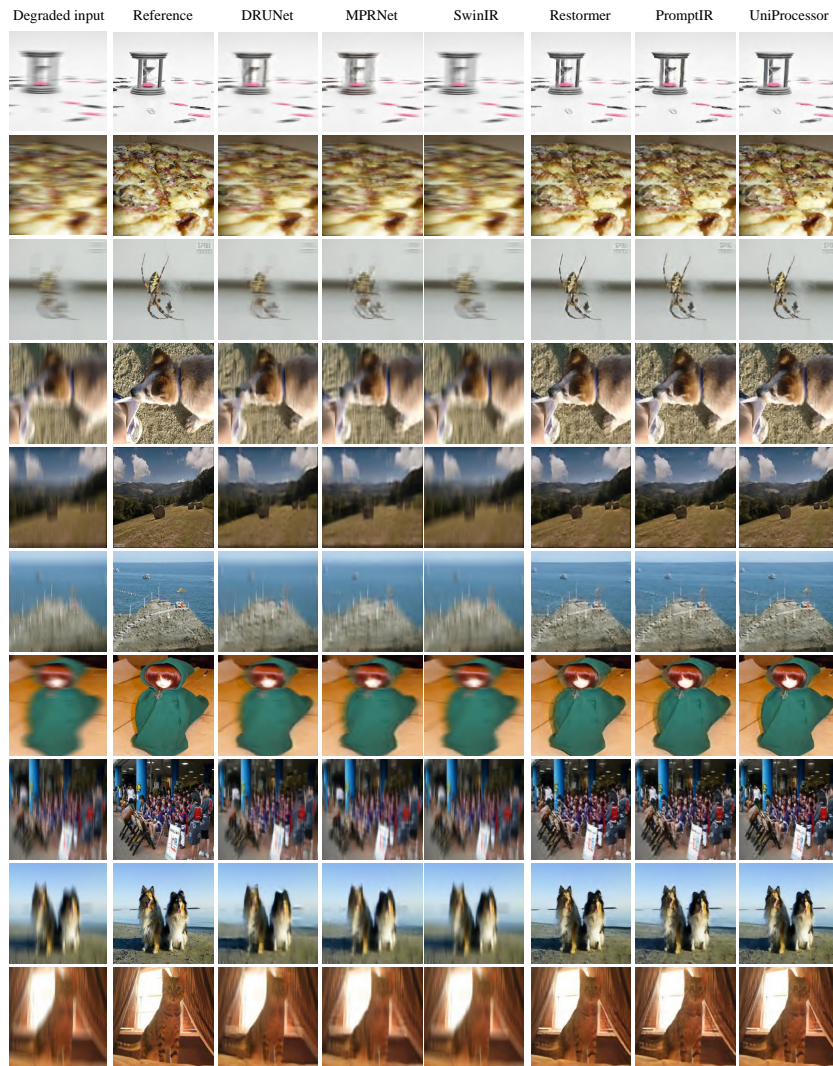

Fig. 9: Visual comparison of different methods on the task of removing motion blur.



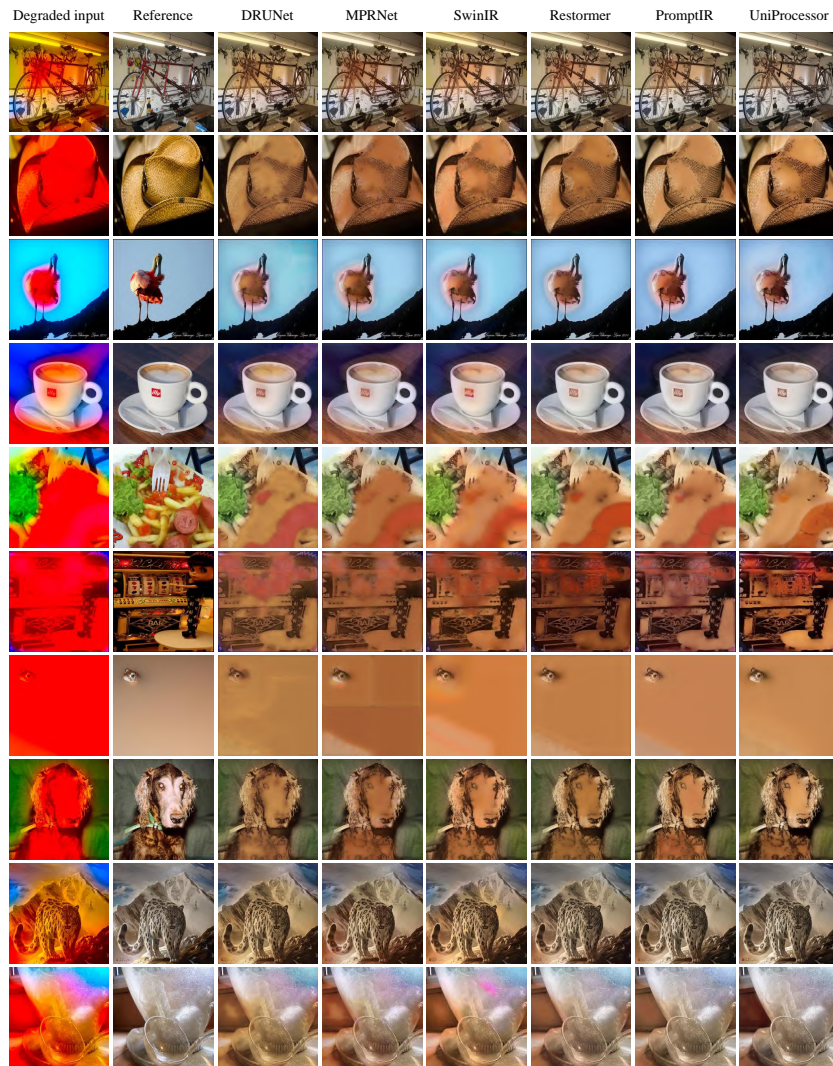

Fig. 10: Visual comparison of different methods on the task of removing color diffuse.

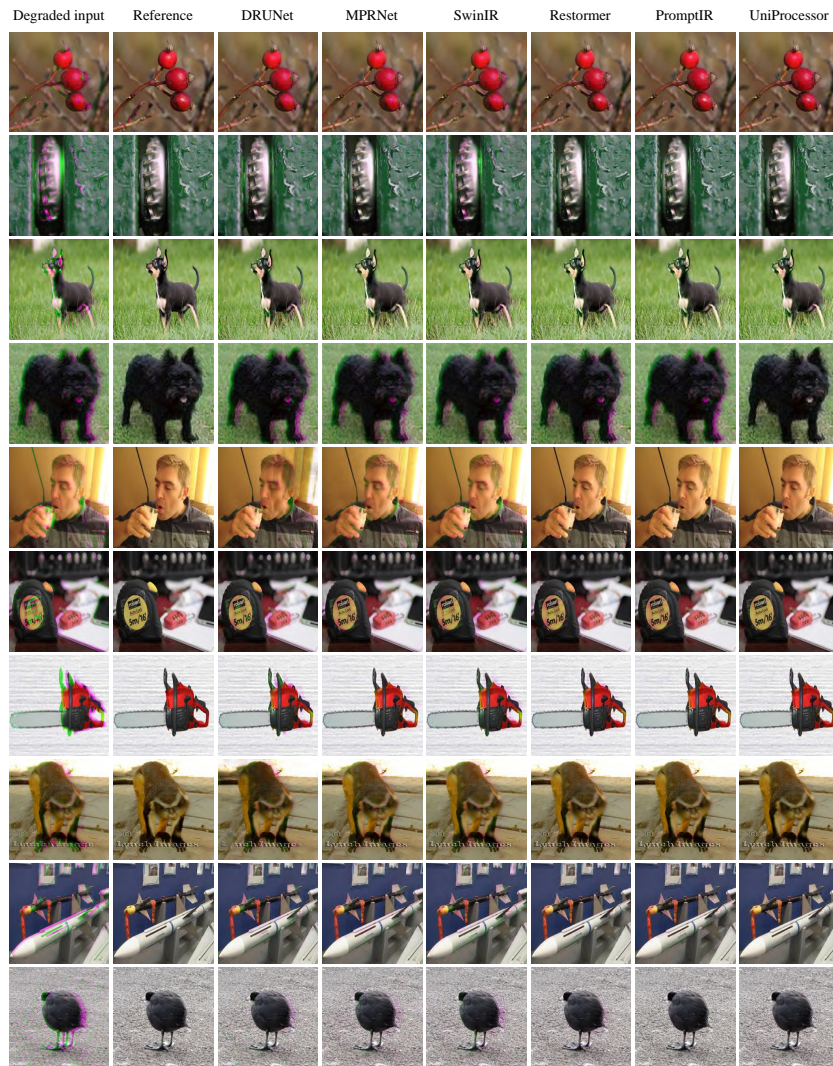

Fig. 11: Visual comparison of different methods on the task of removing color shift.

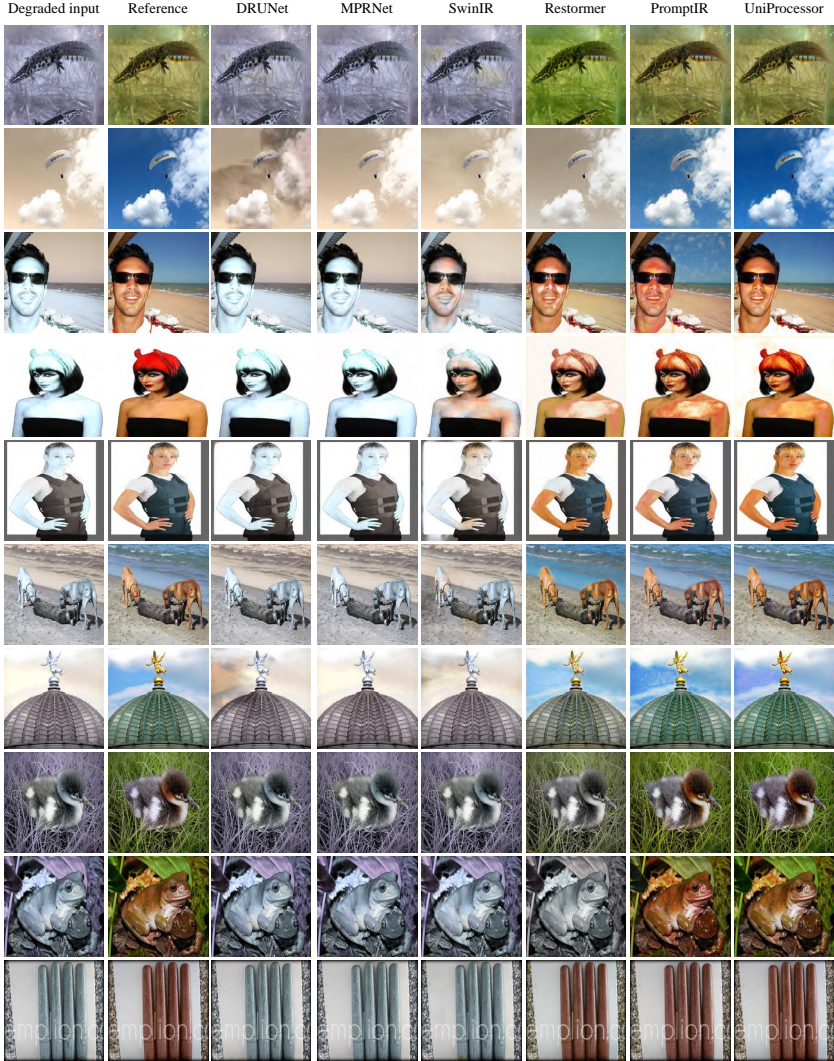

Fig. 12: Visual comparison of different methods on the task of removing color saturate.

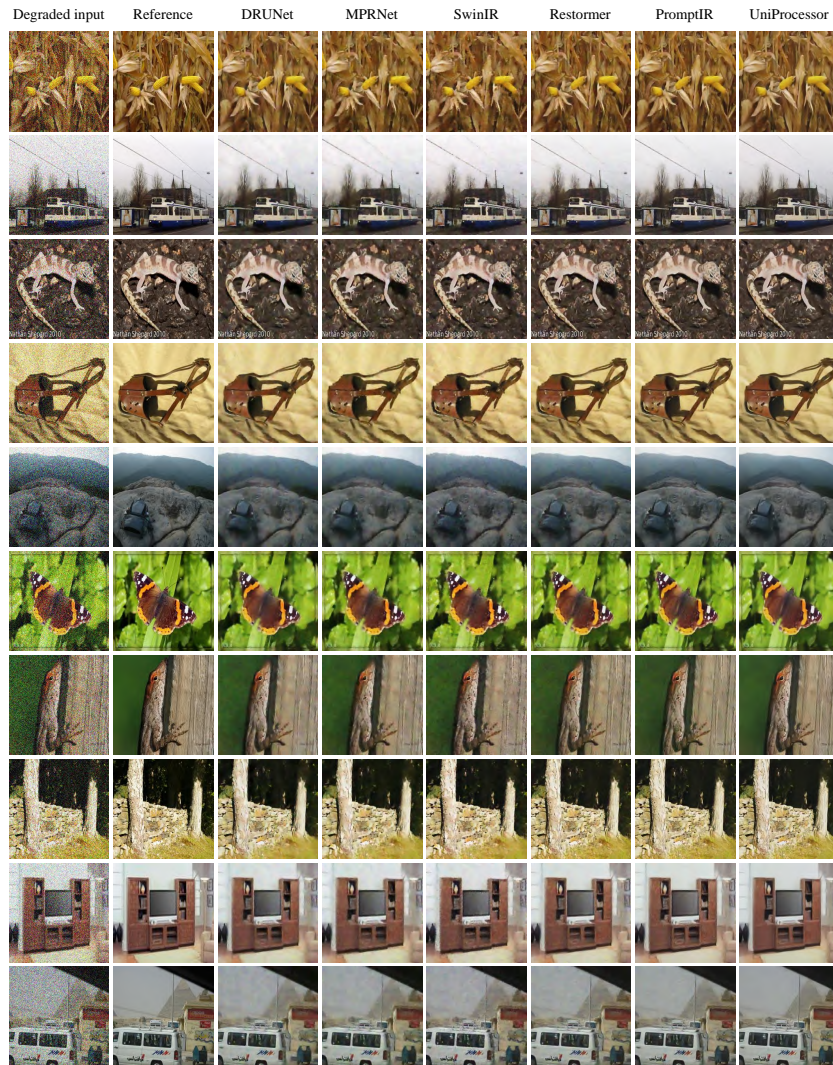

**Fig. 13:** Visual comparison of different methods on the task of removing Gaussian noise.

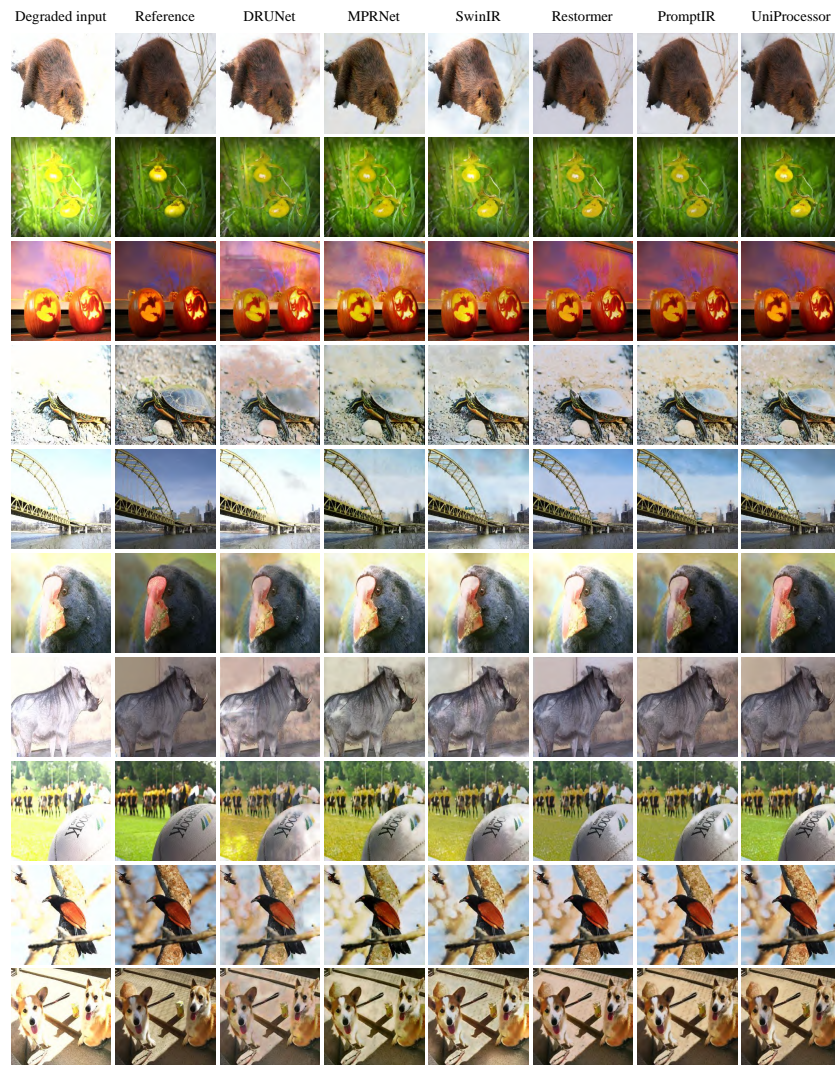

**Fig. 14:** Visual comparison of different methods on the task of removing over bright degradation.

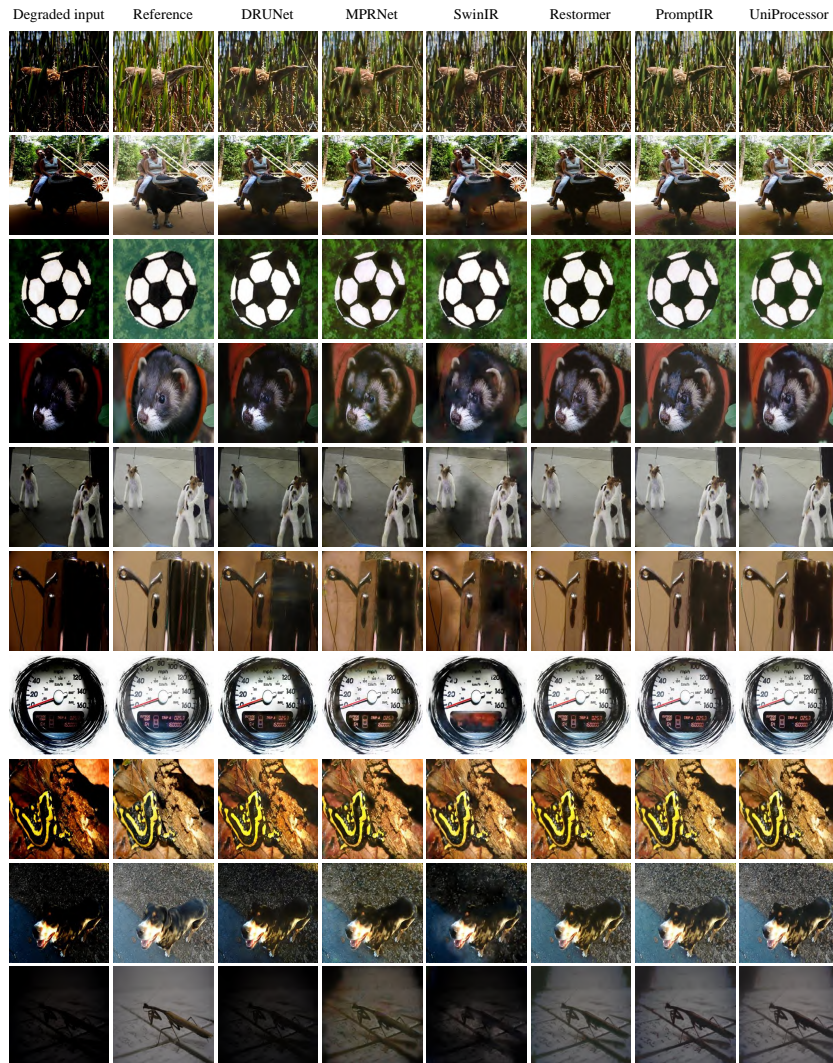

**Fig. 15:** Visual comparison of different methods on the task of removing over dark degradation.

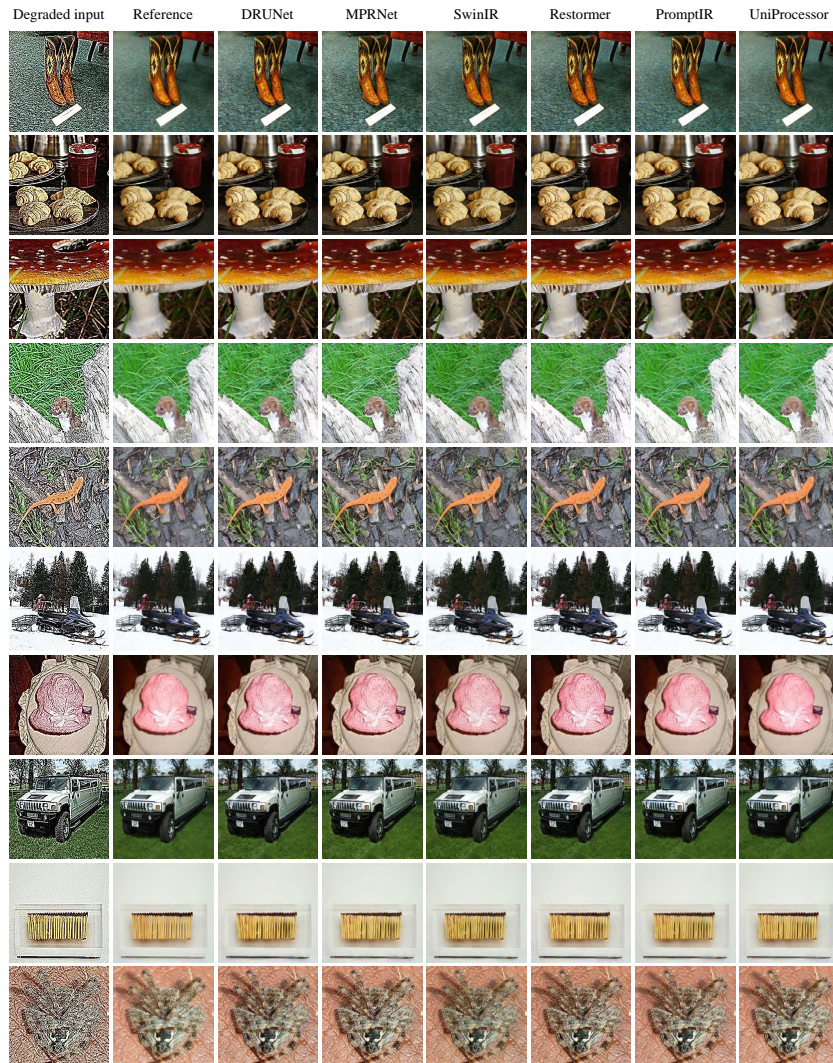

**Fig. 16:** Visual comparison of different methods on the task of removing over sharpening degradation.

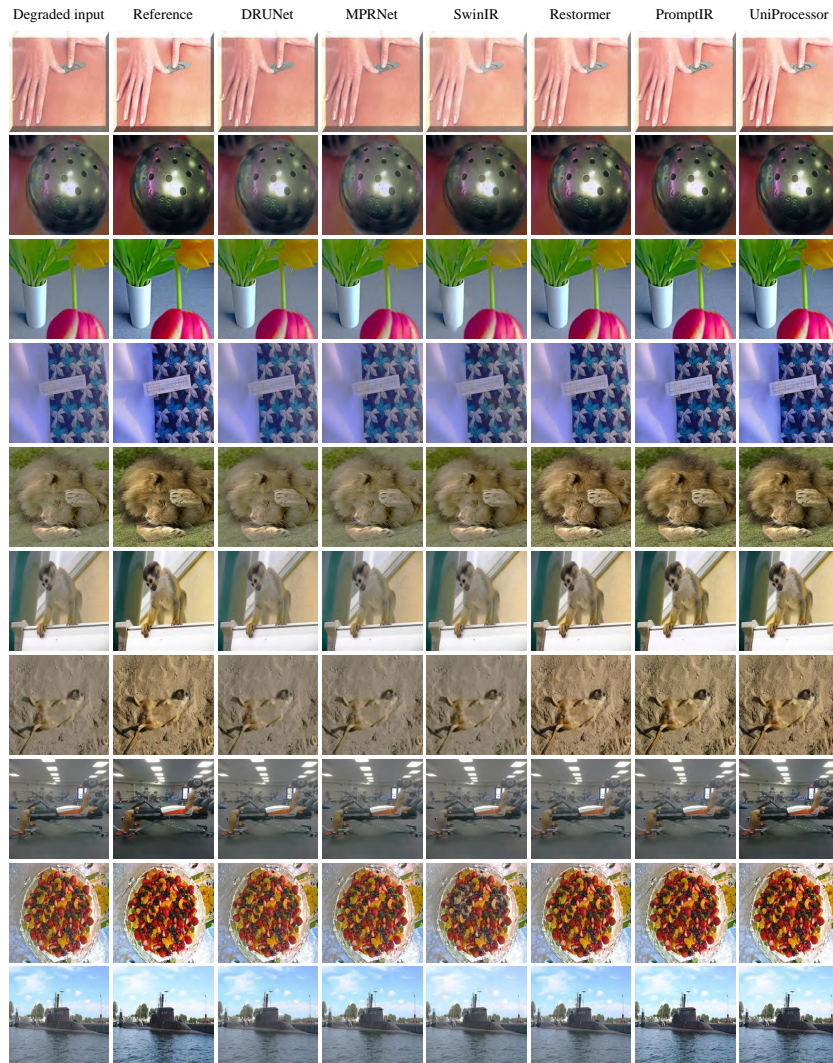

**Fig. 17:** Visual comparison of different methods on the task of removing contrast imbalance degradation.



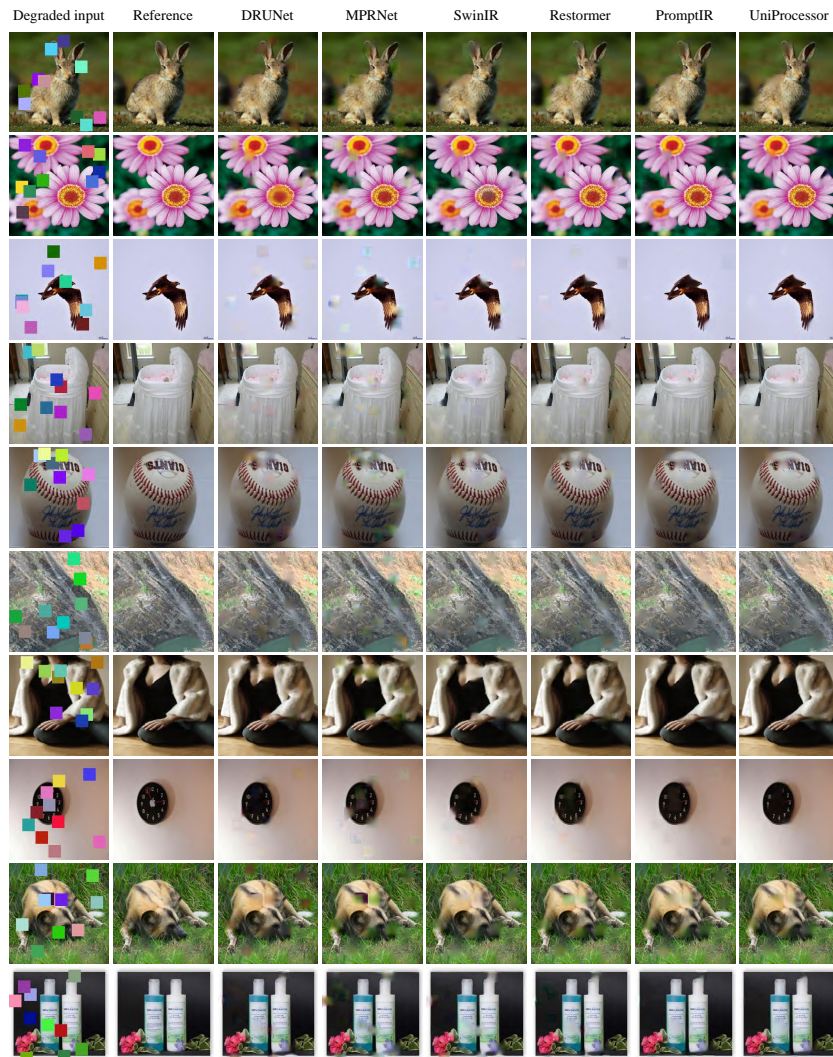

Fig. 18: Visual comparison of different methods on the task of removing color block.

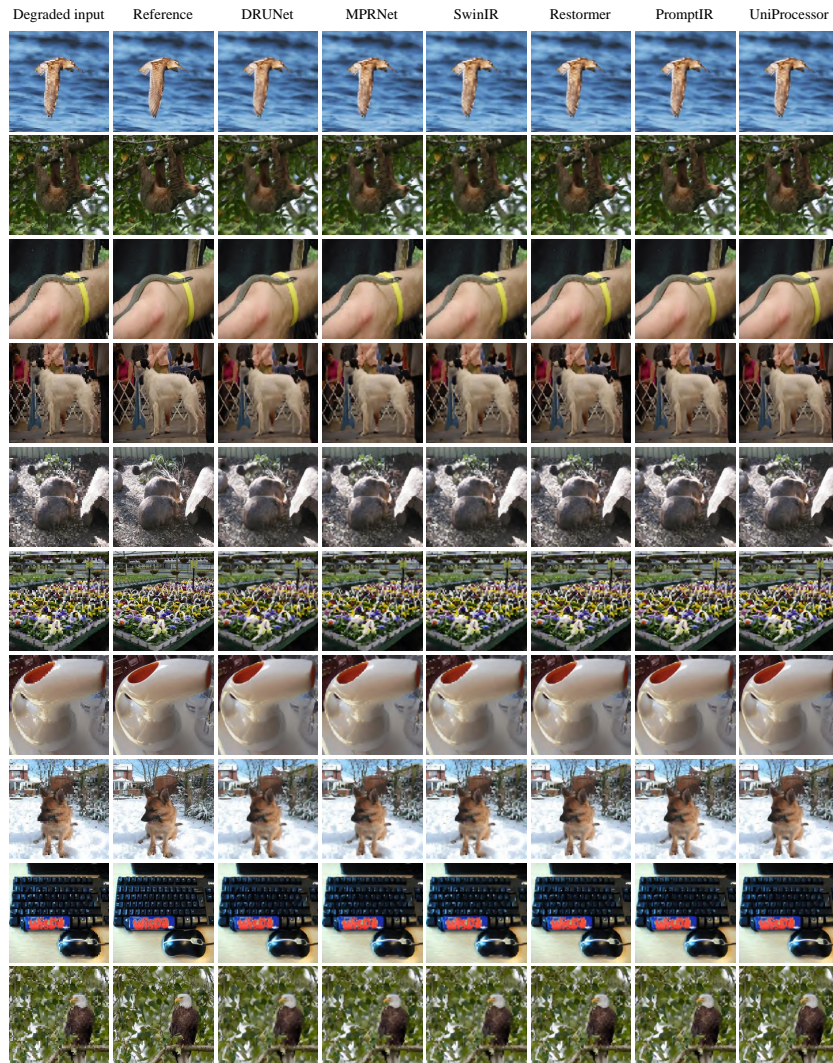

**Fig. 19:** Visual comparison of different methods on the task of removing pixelate degradation.

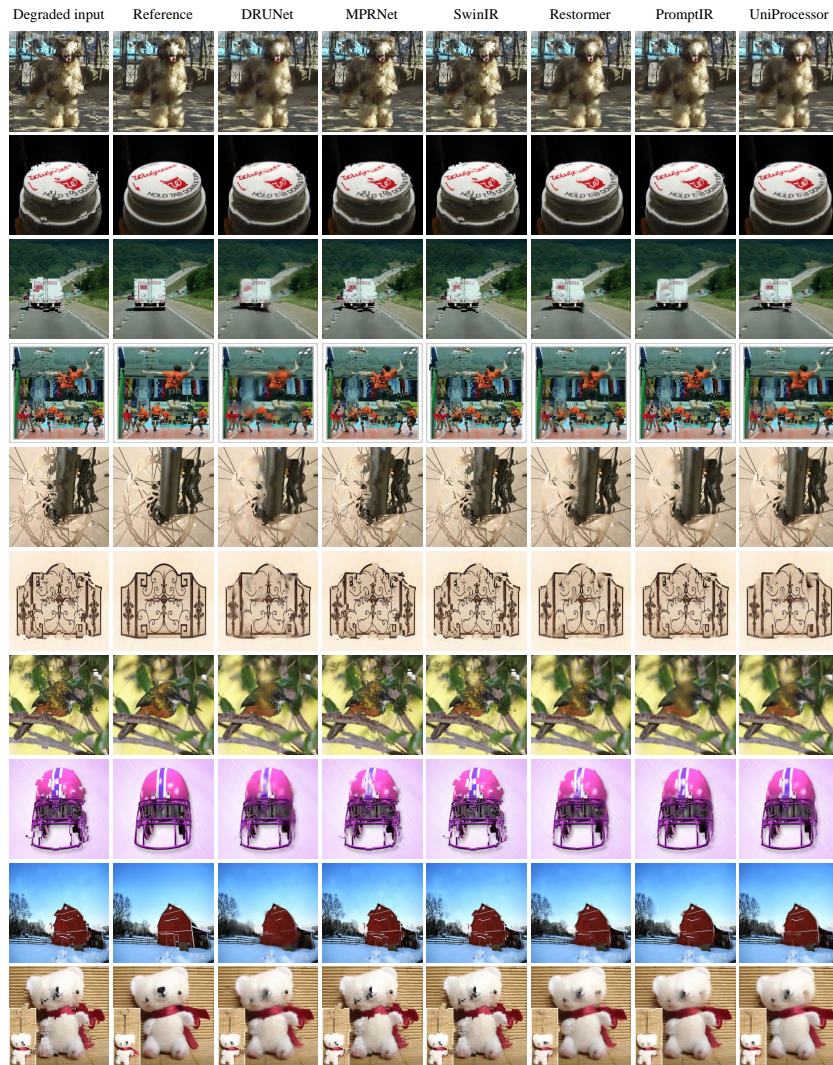

**Fig. 20:** Visual comparison of different methods on the task of removing discontinuous degradation.

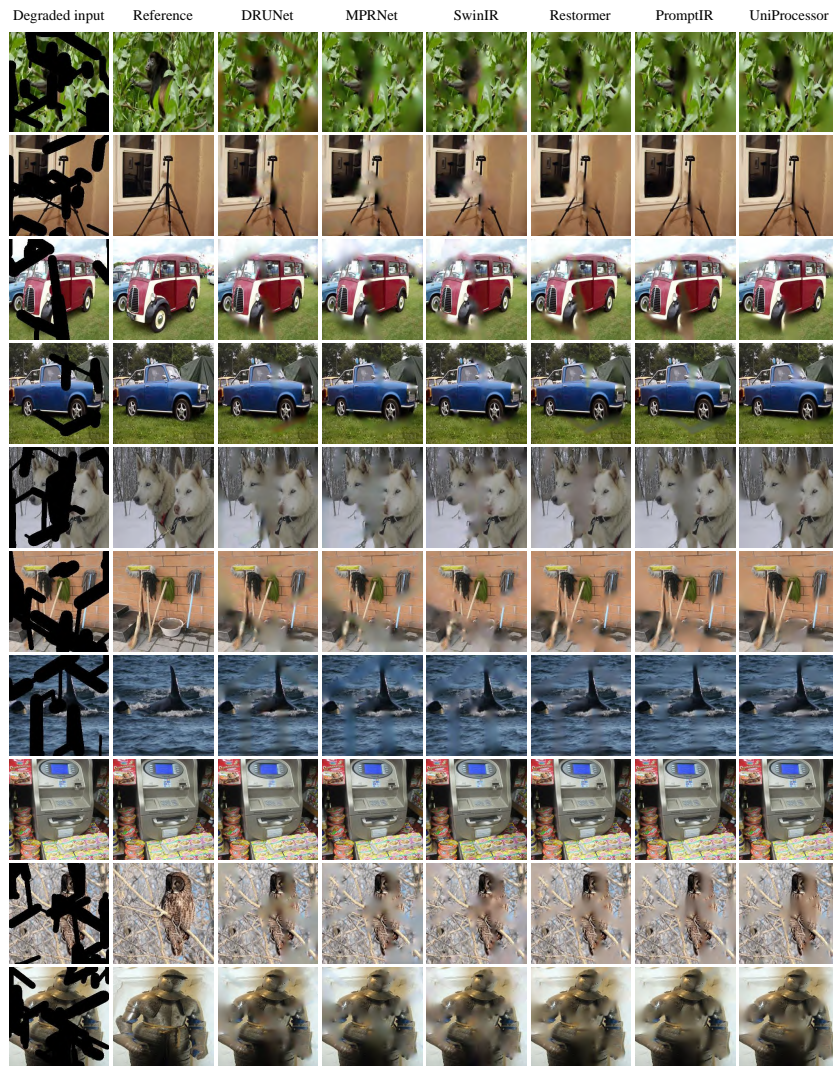

Fig. 21: Visual comparison of different methods on the task of inpainting.

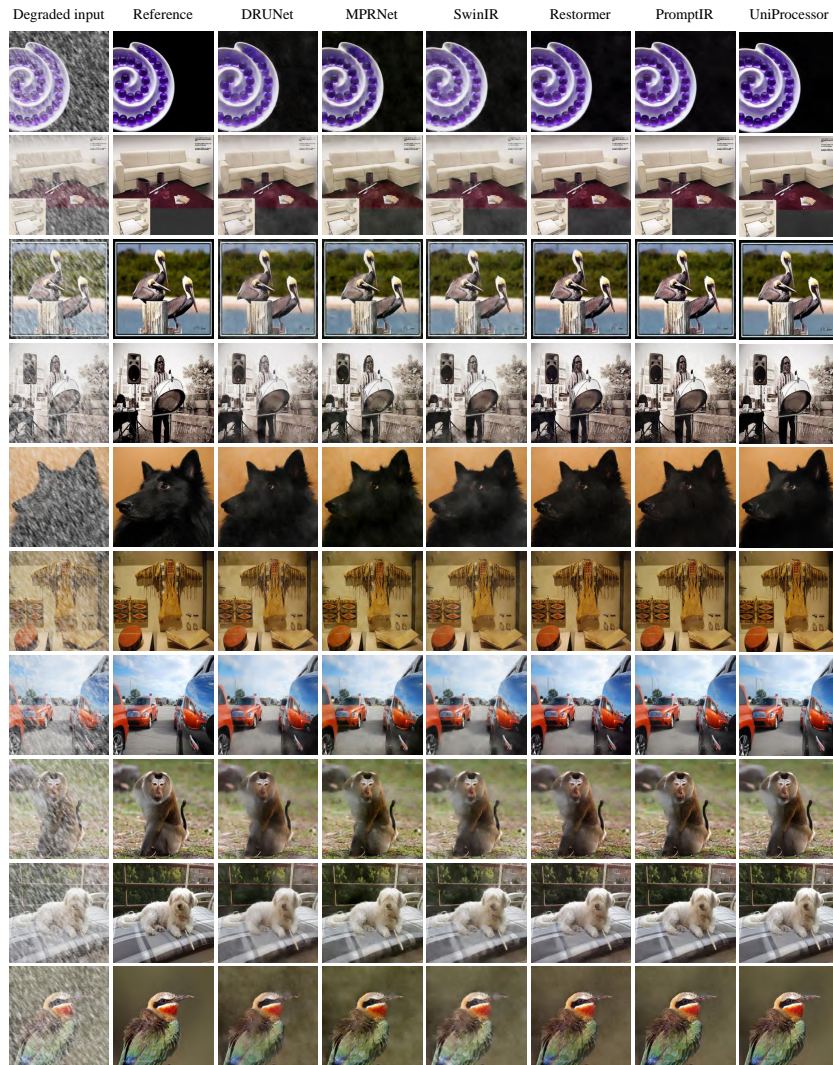

**Fig. 22:** Visual comparison of different methods on the task of single image rain removal.

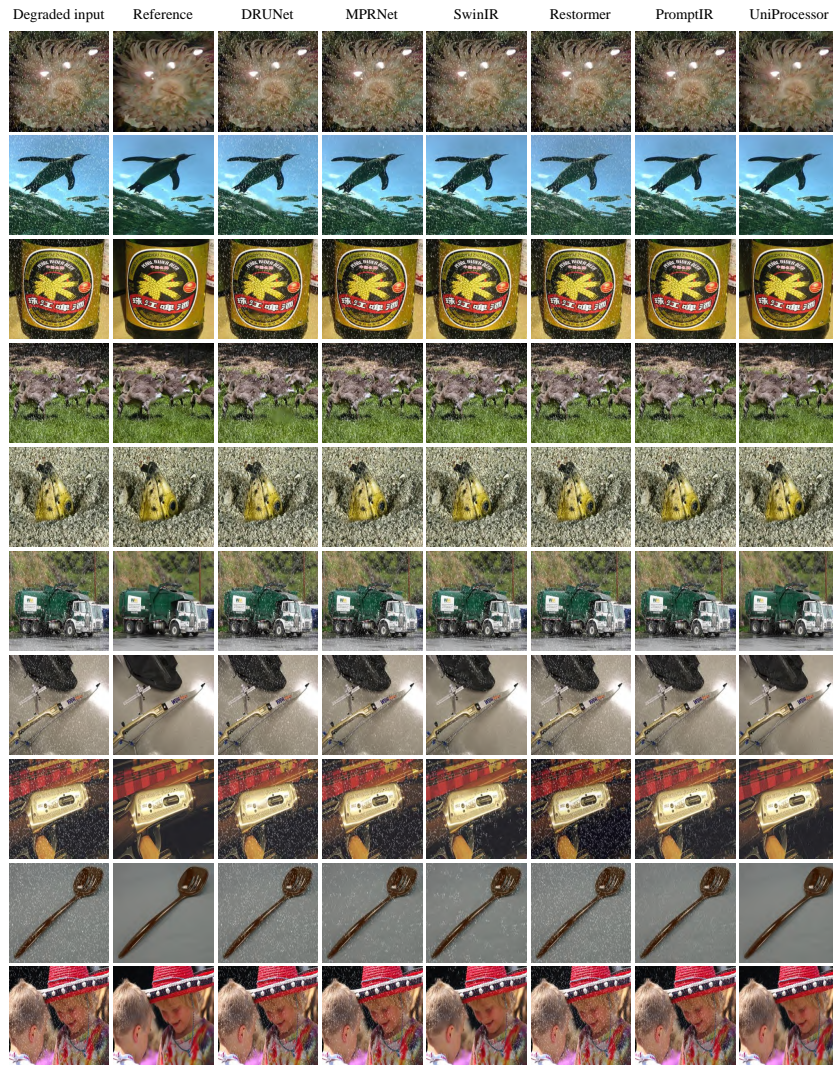

**Fig. 23:** Visual comparison of different methods on the task of single image snow removal.

## References

1. Dai, W., Li, J., Li, D., Tiong, A.M.H., Zhao, J., Wang, W., Li, B., Fung, P., Hoi, S.: Instructblip: Towards general-purpose vision-language models with instruction tuning. In: Proceedings of the Advances in Neural Information Processing Systems (NeurIPS) (2023) **5**, **13**
2. Deng, J., Dong, W., Socher, R., Li, L.J., Li, K., Fei-Fei, L.: Imagenet: A large-scale hierarchical image database. In: Proceedings of the IEEE Conference on Computer Vision and Pattern Recognition (CVPR). pp. 248–255 (2009) **8**
3. Duan, H., Shen, W., Min, X., Tu, D., Teng, L., Wang, J., Zhai, G.: Masked autoencoders as image processors. arXiv preprint arXiv:2303.17316 (2023) **5**
4. Franzen, R.: Kodak lossless true color image suite. <http://r0k.us/graphics/kodak/> (1999), online accessed 24 Oct 2021 **7**
5. Li, J., Li, D., Savarese, S., Hoi, S.: Blip-2: Bootstrapping language-image pre-training with frozen image encoders and large language models. In: Proceedings of the International Conference on Machine Learning (ICML) (2023) **4**
6. Liang, J., Cao, J., Sun, G., Zhang, K., Van Gool, L., Timofte, R.: Swinir: Image restoration using swin transformer. In: Proceedings of the IEEE International Conference on Computer Vision (ICCV). pp. 1833–1844 (2021) **6**, **7**, **8**
7. Liu, Z., Lin, Y., Cao, Y., Hu, H., Wei, Y., Zhang, Z., Lin, S., Guo, B.: Swin transformer: Hierarchical vision transformer using shifted windows. In: Proceedings of the IEEE International Conference on Computer Vision (ICCV). pp. 10012–10022 (2021) **5**
8. Martin, D., Fowlkes, C., Tal, D., Malik, J.: A database of human segmented natural images and its application to evaluating segmentation algorithms and measuring ecological statistics. In: Proceedings of the IEEE International Conference on Computer Vision (ICCV). pp. 416–423 (2001) **6**, **7**
9. Potlapalli, V., Zamir, S.W., Khan, S., Khan, F.S.: Promptir: Prompting for all-in-one blind image restoration. Proceedings of the Advances in Neural Information Processing Systems (NeurIPS) (2023) **6**, **7**, **8**
10. Saha, A., Mishra, S., Bovik, A.C.: Re-iqa: Unsupervised learning for image quality assessment in the wild. In: Proceedings of the IEEE Conference on Computer Vision and Pattern Recognition (CVPR). pp. 5846–5855 (2023) **1**
11. Suvorov, R., Logacheva, E., Mashikhin, A., Remizova, A., Ashukha, A., Silvestrov, A., Kong, N., Goka, H., Park, K., Lempitsky, V.: Resolution-robust large mask inpainting with fourier convolutions. In: Proceedings of the IEEE Winter Conference on Applications of Computer Vision (WACV). pp. 2149–2159 (2022) **1**
12. Wang, Z., Cun, X., Bao, J., Zhou, W., Liu, J., Li, H.: Uformer: A general u-shaped transformer for image restoration. In: Proceedings of the IEEE Conference on Computer Vision and Pattern Recognition (CVPR). pp. 17683–17693 (2022) **6**, **7**, **8**
13. Wang, Z., Bovik, A.C., Sheikh, H.R., Simoncelli, E.P.: Image quality assessment: from error visibility to structural similarity. IEEE Transactions on Image Processing (TIP) **13**(4), 600–612 (2004) **6**, **7**, **8**
14. Woo, S., Debnath, S., Hu, R., Chen, X., Liu, Z., Kweon, I.S., Xie, S.: Convnext v2: Co-designing and scaling convnets with masked autoencoders. In: Proceedings of the IEEE/CVF Conference on Computer Vision and Pattern Recognition. pp. 16133–16142 (2023) **5**
15. Zamir, S.W., Arora, A., Khan, S., Hayat, M., Khan, F.S., Yang, M.H.: Restormer: Efficient transformer for high-resolution image restoration. In: Proceedings of the

- IEEE Conference on Computer Vision and Pattern Recognition (CVPR). pp. 5728–5739 (2022) [6](#), [7](#), [8](#)
16. Zamir, S.W., Arora, A., Khan, S., Hayat, M., Khan, F.S., Yang, M.H., Shao, L.: Multi-stage progressive image restoration. In: Proceedings of the IEEE Conference on Computer Vision and Pattern Recognition (CVPR). pp. 14821–14831 (2021) [6](#), [7](#), [8](#)
  17. Zhang, K., Li, Y., Zuo, W., Zhang, L., Van Gool, L., Timofte, R.: Plug-and-play image restoration with deep denoiser prior. *IEEE Transactions on Pattern Analysis and Machine Intelligence (TPAMI)* **44**(10), 6360–6376 (2021) [6](#), [7](#), [8](#)
  18. Zhang, K., Zuo, W., Gu, S., Zhang, L.: Learning deep cnn denoiser prior for image restoration. In: Proceedings of the IEEE Conference on Computer Vision and Pattern Recognition (CVPR). pp. 3929–3938 (2017) [1](#)
  19. Zhang, R., Isola, P., Efros, A.A., Shechtman, E., Wang, O.: The unreasonable effectiveness of deep features as a perceptual metric. In: Proceedings of the IEEE Conference on Computer Vision and Pattern Recognition (CVPR). pp. 586–595 (2018) [6](#), [7](#), [8](#)
